# Supplementary material for: The social media diet: A scoping review to investigate the association between social media, body image and eating disorders amongst young people
Source: PubMed Central journal article supplement (PMC10032524; doi:10.1371/journal.pgph.0001091), 2023-03-22
Supplement: pgph.0001091.s002.pdf [file pgph.0001091.s002.pdf]

## S2 Table. Summaries of individual studies

| #  | Author                     | Country & World Bank Classification | Study Design | Participant characteristics                                                                                 |                                                                                         | Objectives                                                                            | Underlying theoretical framework | Social media platform | Exposure measure (Social media use)                                                                | Outcome measure (BI/ED symptomatology)                                        | Mediator measure                                                                              | Moderator measure | Results                                                                                                                                                                                                                                                                                                            | Quality appraisal grade |
|----|----------------------------|-------------------------------------|--------------|-------------------------------------------------------------------------------------------------------------|-----------------------------------------------------------------------------------------|---------------------------------------------------------------------------------------|----------------------------------|-----------------------|----------------------------------------------------------------------------------------------------|-------------------------------------------------------------------------------|-----------------------------------------------------------------------------------------------|-------------------|--------------------------------------------------------------------------------------------------------------------------------------------------------------------------------------------------------------------------------------------------------------------------------------------------------------------|-------------------------|
| 1. | Brown and Tiggemann (2016) | Australia<br>High-income economy    | Experimental | N (% F)<br>Setting:<br>Age range<br>(mean +- SD)<br>BMI<br>Ethnicity<br>Sexual orientation<br>ED prevalence | 138 (100% F)<br>University<br>18-30 (20.10 +- 2.61)<br>22.61<br>77.4% White<br>NR<br>NR | Investigated the impact of attractive celebrity and peer images on women's body image | Social comparison theory         | IG                    | Randomly assigned to view attractive celebrity images, peer images or control set of travel images | Negative mood and BID:<br>Heinberg and Thompson (1996) visual analogue scales | Appearance comparisons<br>: The State Appearance Comparison Scale (Tiggemann and McGill 2004) | N/A               | Exposure to celebrity & peer images both increased negative mood and BID relative to travel images with small/moderate effect size<br>Relationship mediated by appearance comparisons<br>Partly agrees with social comparison theory but participants compared despite being 'unknown' celebrities<br>Blurred line | Moderate                |

| #  | Author              | Country & World Bank Classification | Study Design | Participant characteristics                                                                                    |                                                                                                                                                                    | Objectives                                                                                  | Underlying theoretical framework | Social media platform | Exposure measure (Social media use) | Outcome measure (BI/ED symptomatology) | Mediator measure | Moderator measure                                                                                                                                                                                  | Results                                                                                                                                                                                                                                                                                               | Quality appraisal grade |
|----|---------------------|-------------------------------------|--------------|----------------------------------------------------------------------------------------------------------------|--------------------------------------------------------------------------------------------------------------------------------------------------------------------|---------------------------------------------------------------------------------------------|----------------------------------|-----------------------|-------------------------------------|----------------------------------------|------------------|----------------------------------------------------------------------------------------------------------------------------------------------------------------------------------------------------|-------------------------------------------------------------------------------------------------------------------------------------------------------------------------------------------------------------------------------------------------------------------------------------------------------|-------------------------|
|    |                     |                                     |              |                                                                                                                |                                                                                                                                                                    |                                                                                             |                                  |                       |                                     |                                        |                  |                                                                                                                                                                                                    | between celebrities and peers- elevated bar due to editing features                                                                                                                                                                                                                                   |                         |
| 2. | Kim and Park (2016) | US High-income economy              | Experimental | N (% F)<br>Setting<br>Age range<br>(mean +- SD)<br>BMI<br>Ethnicity<br><br>Sexual orientation<br>ED prevalence | 116 (100% F)<br>University<br>NR (23+- 3.21)<br>23.79<br>38.8% White,<br>31.9% Asian,<br>10.3% African American,<br>5.2% Hispanic,<br>8.6% multiracial<br>NR<br>NR | Investigated the effects of FB News Feed photos on female student's appearance satisfaction | Social comparison theory         | FB                    | FB News Feed exposure               | BID: Visual analogue scales            | N/A              | Levels of appearance comparison orientation:<br>Physical Appearance Comparison Scale<br><br>Self-esteem: Rosenberg self-esteem scale<br><br>Appearance schemas: Appearance schemas inventory (ASI) | Exposure to photographs of attractive females → less satisfaction with own BI relative to exposure to less attractive females on FB news feed<br>Mediated by social comparison (upward)<br>Moderated by appearance comparison orientation, appearance schemas (high) and self-esteem (low): heightens | Moderate                |

| #  | Author              | Country & World Bank Classification | Study Design | Participant characteristics                                                                                        |                                                                                                                                                                                                                                      | Objectives                                                                                                                                                          | Underlying theoretical framework                     | Social media platform | Exposure measure (Social media use)                                                 | Outcome measure (BI/ED symptomatology)                | Mediator measure                                     | Moderator measure | Results                                                                                                                                                                                                                                                                                                                    | Quality appraisal grade |
|----|---------------------|-------------------------------------|--------------|--------------------------------------------------------------------------------------------------------------------|--------------------------------------------------------------------------------------------------------------------------------------------------------------------------------------------------------------------------------------|---------------------------------------------------------------------------------------------------------------------------------------------------------------------|------------------------------------------------------|-----------------------|-------------------------------------------------------------------------------------|-------------------------------------------------------|------------------------------------------------------|-------------------|----------------------------------------------------------------------------------------------------------------------------------------------------------------------------------------------------------------------------------------------------------------------------------------------------------------------------|-------------------------|
|    |                     |                                     |              |                                                                                                                    |                                                                                                                                                                                                                                      |                                                                                                                                                                     |                                                      |                       |                                                                                     |                                                       |                                                      |                   | vulnerability to effect                                                                                                                                                                                                                                                                                                    |                         |
| 3. | Murray et al (2016) | Canada                              | CS           | N (% F)<br>Setting<br>Age<br>Age range (mean +- SD)<br>BMI<br>Ethnicity<br><br>Sexual orientation<br>ED prevalence | 388 (70.2% F)<br>University<br>NR (23.08 +- 3.09)<br>NR<br>52.2% White<br>American,<br>12.9% European,<br>11.3% Asian,<br>8.4% Middle Eastern, 5.2% African, 37% Caribbean, 1.8%<br>Central/South American,<br>42% Other<br>NR<br>NR | Investigated whether body image concerns (appearance & weight esteem) mediate the relationship between time spent on SNS and DE behaviours (restrained & emotional) | Social comparison theory<br><br>Sociocultural theory | General               | Excessive SM use: adapted version of the generalised problematic internet use scale | DE: Disordered Eating Behaviours Questionnaire (DEBQ) | BI: The Body Esteem Scale for Adolescents and Adults | N/A               | Excessive time on SM → diminished weight and appearance esteem → emotional eating for females only<br>Excessive time on SNS → diminished weight and appearance esteem → restrained eating for both genders<br>BI (appearance and weight esteem) mediated the relationship<br>Partly moderated by gender (emotional eating) | High                    |

| #  | Author              | Country & World Bank Classification | Study Design               | Participant characteristics                                                                                       |                                                                          | Objectives                                                                                                                                  | Underlying theoretical framework | Social media platform | Exposure measure (Social media use) | Outcome measure (BI/ED symptomatology)                                                                                                                                                                                                | Mediator measure                                                                                                                           | Moderator measure                        | Results                                                                                                                                                                                                                                                                      | Quality appraisal grade |
|----|---------------------|-------------------------------------|----------------------------|-------------------------------------------------------------------------------------------------------------------|--------------------------------------------------------------------------|---------------------------------------------------------------------------------------------------------------------------------------------|----------------------------------|-----------------------|-------------------------------------|---------------------------------------------------------------------------------------------------------------------------------------------------------------------------------------------------------------------------------------|--------------------------------------------------------------------------------------------------------------------------------------------|------------------------------------------|------------------------------------------------------------------------------------------------------------------------------------------------------------------------------------------------------------------------------------------------------------------------------|-------------------------|
|    |                     |                                     |                            |                                                                                                                   |                                                                          |                                                                                                                                             |                                  |                       |                                     |                                                                                                                                                                                                                                       |                                                                                                                                            |                                          | Directionality of relationship not certain (i.e., SM → BI or BI → SM)                                                                                                                                                                                                        |                         |
| 4. | Puccio et al (2016) | Australia<br>High-income economy    | Observational longitudinal | N (% F)<br>Setting<br>Age<br>Age range<br>(mean +- SD)<br>BMI<br>Ethnicity<br>Sexual orientation<br>ED prevalence | 245 (100% F)<br>University<br>NR (23.77 +- 7.10)<br>NR<br>NR<br>NR<br>NR | Investigated the mediating role of social comparisons and the moderating role of sociotrophy on the relationship between FB and BN symptoms | Dual pathway model               | FB                    | FB usage                            | BN symptoms: Bulimia & food preoccupation scale from EAT-26<br><br>BID: Body parts satisfaction scale<br><br>Depressive symptoms: Centre for Epidemiologic Studies Depression scale<br><br>Dietary restraint: dieting subscale EAT-26 | Social comparisons : 7 questions adapted from Fardouly and Vartanian (2015)<br><br>Thin ideal internalization: Ideal Body Stereotype Scale | Sociotrophy: Personal Style Inventory-11 | BID is a risk factor for the development of BN, depression, and restrained eating- support for BI as a mediator<br>Personality trait sociotrophy strengthens this relationship – support for sociotrophy as a moderator<br>Supports the mediating role of social comparisons | High                    |
| 5. | Tan et al           | Singapore                           | CS                         | N (% F)                                                                                                           | 56 (94.5% F)                                                             | Investigated                                                                                                                                | Gratification's                  | Multiple (FB,         | SM usage:                           | DE: EDE-Q 6.0                                                                                                                                                                                                                         | N/A                                                                                                                                        | N/A                                      | Those with                                                                                                                                                                                                                                                                   | Moderat                 |

| # | Author | Country & World Bank Classification | Study Design | Participant characteristics                                                                  | Objectives                                                                                                                                                   | Underlying theoretical framework                                                                             | Social media platform | Exposure measure (Social media use) | Outcome measure (BI/ED symptomatology) | Mediator measure                                          | Moderator measure | Results                                                                                                                                                                                                                                                                                                                                                                              | Quality appraisal grade |
|---|--------|-------------------------------------|--------------|----------------------------------------------------------------------------------------------|--------------------------------------------------------------------------------------------------------------------------------------------------------------|--------------------------------------------------------------------------------------------------------------|-----------------------|-------------------------------------|----------------------------------------|-----------------------------------------------------------|-------------------|--------------------------------------------------------------------------------------------------------------------------------------------------------------------------------------------------------------------------------------------------------------------------------------------------------------------------------------------------------------------------------------|-------------------------|
|   | (2016) | High-income economy                 |              | Setting<br>Age range (mean +- SD)<br>BMI<br>Ethnicity<br>Sexual orientation<br>ED prevalence | Clinical<br>NR (20.84 +- 6.67)<br>18.17<br>74.1%<br>Chinese, 13.4% Malays, 9.2% Indians, 3.3% Other<br>NR<br>18.2% AN<br>23.6% binge-purging, 34.5% BN, 9.1% | relationship between SM use and severity of illness for ED patients presenting at Singapore General Hospital | theory                | YT)                                 | self-reported questionnaire            | questionnaire to assess disordered eating in past 10 days |                   | higher DE scores sought out content that perpetuated and maintained ED<br>YouTube as primary concern in seeking out food and exercise related materials (unregulated content)<br>Top 3 reasons for SM use: weight loss information, tips on hiding ED, finding support<br>Of those visiting FB ED groups, 50% stated that it helped to maintain their ED<br>70.9% reported comparing | e                       |

| #  | Author                 | Country & World Bank Classification         | Study Design | Participant characteristics                                                                                 |                                                                                                                                              | Objectives                                                                                                                                                                | Underlying theoretical framework                             | Social media platform | Exposure measure (Social media use) | Outcome measure (BI/ED symptomatology)          | Mediator measure                                                                                                 | Moderator measure                                        | Results                                                                                                                                                                                                                                                                                        | Quality appraisal grade |
|----|------------------------|---------------------------------------------|--------------|-------------------------------------------------------------------------------------------------------------|----------------------------------------------------------------------------------------------------------------------------------------------|---------------------------------------------------------------------------------------------------------------------------------------------------------------------------|--------------------------------------------------------------|-----------------------|-------------------------------------|-------------------------------------------------|------------------------------------------------------------------------------------------------------------------|----------------------------------------------------------|------------------------------------------------------------------------------------------------------------------------------------------------------------------------------------------------------------------------------------------------------------------------------------------------|-------------------------|
|    |                        |                                             |              |                                                                                                             |                                                                                                                                              |                                                                                                                                                                           |                                                              |                       |                                     |                                                 |                                                                                                                  |                                                          | themselves to others on SM                                                                                                                                                                                                                                                                     |                         |
| 6. | Ahadzadeh et al (2017) | Malaysia<br><br>Upper-middle-income economy | CS           | N (% F)<br>Setting<br>Age range (mean +- SD)<br>BMI<br>Ethnicity<br><br>Sexual orientation<br>ED prevalence | 273 (62.3% F)<br>University<br>18-26 (20.09 +- NR)<br>21.03<br>Malay (7%),<br>Chinese (83.9%),<br>Indian (2.6%),<br>Other (6.6%)<br>NR<br>NR | Investigated the effect of IG usage on BID and whether this is mediated by appearance self-schema and self-discrepancy<br><br>Investigated moderating role of self-esteem | Social comparison theory<br><br>Impression management theory | IG                    | IG photo exposure                   | BI: 9-item Body Areas Satisfaction Scale (BASS) | Self-schema: beliefs about appearance questionnaire<br><br>Self-discrepancy: The body image ideals questionnaire | Self-esteem: Rosenberg (1965) scale measuring self-worth | Exposure to IG photos led to BID<br><br>Mediated by self-schema (caring about own appearance) and self-discrepancy (gap between actual and ideal self)<br><br>Self-esteem moderated this – stronger relationship between IG use, self-schema & self-discrepancy for those with low self esteem | Moderate                |

| #  | Author                | Country & World Bank Classification | Study Design             | Participant characteristics                                                                                 |                                                                                                                                   | Objectives                                                                                     | Underlying theoretical framework | Social media platform | Exposure measure (Social media use)                          | Outcome measure (BI/ED symptomatology)    | Mediator measure            | Moderator measure                 | Results                                                                                                                                                                                                                                                                                                                                                   | Quality appraisal grade |
|----|-----------------------|-------------------------------------|--------------------------|-------------------------------------------------------------------------------------------------------------|-----------------------------------------------------------------------------------------------------------------------------------|------------------------------------------------------------------------------------------------|----------------------------------|-----------------------|--------------------------------------------------------------|-------------------------------------------|-----------------------------|-----------------------------------|-----------------------------------------------------------------------------------------------------------------------------------------------------------------------------------------------------------------------------------------------------------------------------------------------------------------------------------------------------------|-------------------------|
| 7. | Burnette et al (2017) | US<br>High-income economy           | Qualitative focus groups | N (% F)<br>Setting<br>Age range (mean +- SD)<br>BMI<br>Ethnicity<br><br>Sexual orientation<br>ED prevalence | 38 (100% F)<br>Secondary school<br>12-14 (13.14 +- 0.72)<br>NR<br>86.1% White, 13.9% Black, 5.6% Hispanic, 2.8% Asian<br>NR<br>NR | Investigated the relationship between SM & BI in early adolescent girls using six focus groups | Social learning theory           | General               | SM usage: activities, duration, level of parental monitoring | Feelings towards BI                       | N/A                         | SM literacy<br>School environment | Generally, girls demonstrated high levels of SM literacy and resilience to negative impacts of SM use on BI<br>Endorsed some appearance concerns and comparisons with peers<br>Positive school environment and SM literacy education buffered against deleterious effects- girls learnt about artificiality of SM images, self-acceptance, body diversity | High                    |
| 8. | Cohen et al (2017)    | Australia<br>High-                  | CS                       | N (% F)<br>Setting<br>Age                                                                                   | 259 (100% F)<br>University<br>18-29 (22.97)                                                                                       | Investigated relationship between                                                              | Sociocultural theory             | Multiple & IG         | SM usage:<br>The FB questionnaire                            | BI: Appearance evaluation subscale of the | Thin-ideal internalization: | N/A                               | Appearance focused SM use rather than                                                                                                                                                                                                                                                                                                                     | Moderate                |

| #  | Author              | Country & World Bank Classification         | Study Design | Participant characteristics            |                                                                                                                            | Objectives                                                 | Underlying theoretical framework | Social media platform     | Exposure measure (Social media use) | Outcome measure (BI/ED symptomatology)             | Mediator measure                                                                                 | Moderator measure | Results                                                                                                                                                                                                                                                             | Quality appraisal grade |
|----|---------------------|---------------------------------------------|--------------|----------------------------------------|----------------------------------------------------------------------------------------------------------------------------|------------------------------------------------------------|----------------------------------|---------------------------|-------------------------------------|----------------------------------------------------|--------------------------------------------------------------------------------------------------|-------------------|---------------------------------------------------------------------------------------------------------------------------------------------------------------------------------------------------------------------------------------------------------------------|-------------------------|
|    |                     | income economy                              |              | range (mean +- SD)                     | + - 3.25<br>22.45<br>77.5% White, BMI<br>15.1% Asian, 2.7% Middle Eastern, 0.8% African, 0.8% Aboriginal, 3.1% Other<br>NR | appearance focused SM usage and BI concerns in young women | Objectification theory           |                           | to assess FB appearance exposure    | Multidimensional Body-self relations questionnaire | Internalisation subscale of the sociocultural attitudes towards appearance questionnaire (SATAQ) |                   | overall use was related to BI concerns in young women<br>Thin ideal internalization and body surveillance mediated this relationship<br>Following appearance neutral accounts was not associated with BI outcomes<br>Effect size was stronger for IG compared to FB |                         |
| 9. | Howard et al (2017) | US (Ahadzadeh, Pahlevan Sharif & Ong, 2017) | CS           | N (% F)<br>Setting<br>Age (mean +- SD) | 922 (100% F)<br>University<br>18-30 (21 +- 2.8)<br>25 White,                                                               | Investigated racial differences in SM use and BID and DE   | Gratifications theory            | Multiple: FB, IG, Twitter | SM usage: frequency                 | BID: The body shape questionnaire<br>DE: Eating    | Investment: SM reassurance seeking scale                                                         | Race              | Black women reported marginally less DE and higher BIS but small                                                                                                                                                                                                    | Moderate                |



| #   | Author                  | Country & World Bank Classification     | Study Design | Participant characteristics                                                                                |                                                                                                            | Objectives                                                                      | Underlying theoretical framework | Social media platform | Exposure measure (Social media use)               | Outcome measure (BI/ED symptomatology)                                                                                                                 | Mediator measure | Moderator measure | Results                                                                                                                                                                                      | Quality appraisal grade |
|-----|-------------------------|-----------------------------------------|--------------|------------------------------------------------------------------------------------------------------------|------------------------------------------------------------------------------------------------------------|---------------------------------------------------------------------------------|----------------------------------|-----------------------|---------------------------------------------------|--------------------------------------------------------------------------------------------------------------------------------------------------------|------------------|-------------------|----------------------------------------------------------------------------------------------------------------------------------------------------------------------------------------------|-------------------------|
|     |                         | High-income economy                     |              | BMI                                                                                                        | 28.24                                                                                                      | Black                                                                           |                                  |                       |                                                   | Disorder Examination Questionnaire (EDE-Q)                                                                                                             |                  |                   | effect size<br>Engagement in reassurance seeking on FB (seeking likes and comments) mediated the relationship → more BID and DE for the entire sample<br>Strongest relationship found for FB |                         |
| 10. | Kaewpradub et al (2017) | Thailand<br>Upper-middle-income economy | CS           | N (% F)<br>Setting<br>Age range<br>(mean +- SD)<br>BMI<br>Ethnicity<br>Sexual orientation<br>ED prevalence | 620 (60.3% F)<br>Secondary school<br>NR (15.7 +- 1.9)<br>NR<br>NR<br>NR but ½ had abnormal eating patterns | Investigated the association between time spent on SM, BI and eating behaviours | Sociocultural theory             | General               | SM usage: time spent, exposure to certain content | BI: Thai Body Esteem Scale for Adolescents and Adults<br><br>Drive for muscularity scale<br><br>ED attitudes and behaviour: Thai version of the EAT-26 | N/A              | Gender            | Use of SM was negatively associated with greater BID and time spent using SM was associated with bingeing, purging, use of laxative/weight loss or diuretics and eating behaviours           | Moderate                |

| #   | Author                | Country & World Bank Classification | Study Design               | Participant characteristics                                                                     |                                                                           | Objectives                                                                                         | Underlying theoretical framework                                                         | Social media platform | Exposure measure (Social media use)                                                                           | Outcome measure (BI/ED symptomatology)  | Mediator measure                                                 | Moderator measure              | Results                                                                                                                                                                                | Quality appraisal grade |
|-----|-----------------------|-------------------------------------|----------------------------|-------------------------------------------------------------------------------------------------|---------------------------------------------------------------------------|----------------------------------------------------------------------------------------------------|------------------------------------------------------------------------------------------|-----------------------|---------------------------------------------------------------------------------------------------------------|-----------------------------------------|------------------------------------------------------------------|--------------------------------|----------------------------------------------------------------------------------------------------------------------------------------------------------------------------------------|-------------------------|
|     |                       |                                     |                            | ce                                                                                              |                                                                           |                                                                                                    |                                                                                          |                       |                                                                                                               |                                         |                                                                  |                                | carrying risk of obesity e.g., crash diets. 1/2 of participants demonstrated abnormal eating behaviours<br>Gender was a moderator- female participants had greater BID compared to men |                         |
| 11. | Rousseau et al (2017) | Belgium<br><br>High-income economy  | Observational longitudinal | N (% F)<br>Setting<br>Age range<br>(mean +- SD)<br>BMI<br>Ethnicity<br>Sexual orientation<br>ED | 1840 (48% F)<br>Secondary school<br>12-19 (14.76+-1.41)<br>NR<br>NR<br>NR | Investigated whether passive FB use is related to adolescents BID through comparison over 6 months | Social comparison theory<br><br>Tripartite influence model<br><br>Gratification's theory | FB                    | FB usage: time spent<br><br>Passive FB usage: Passive FB use subscale of the multidimensional scale of FB use | BID: Subscale of the Body Attitude Test | Social comparison: frequency assessed using 5-point Likert scale | Gender<br><br>Pre-existing BID | Significant relationship between passive FB use → appearance comparisons → BID for boys only<br>Comparison on Facebook was not predictive of increases in BID at 6 months              | Moderate                |

| #   | Author                         | Country & World Bank Classification | Study Design | Participant characteristics                                                                                |                                                                  | Objectives                                                                                      | Underlying theoretical framework | Social media platform          | Exposure measure (Social media use)                                                                                                       | Outcome measure (BI/ED symptomatology)                               | Mediator measure | Moderator measure | Results                                                                                                                                                                                                   | Quality appraisal grade |
|-----|--------------------------------|-------------------------------------|--------------|------------------------------------------------------------------------------------------------------------|------------------------------------------------------------------|-------------------------------------------------------------------------------------------------|----------------------------------|--------------------------------|-------------------------------------------------------------------------------------------------------------------------------------------|----------------------------------------------------------------------|------------------|-------------------|-----------------------------------------------------------------------------------------------------------------------------------------------------------------------------------------------------------|-------------------------|
|     |                                |                                     |              | prevalence                                                                                                 |                                                                  |                                                                                                 |                                  |                                |                                                                                                                                           |                                                                      |                  |                   | For both genders, state BID predicted comparisons on FB- suggestive that body dissatisfied individuals seek out comparison content when using FB                                                          |                         |
| 12. | Santarossa and Woodruff (2017) | Canada<br>High-income economy       | CS           | N (% F)<br>Setting<br>Age range<br>(mean +- SD)<br>BMI<br>Ethnicity<br>Sexual orientation<br>ED prevalence | 212 (55% F)<br>University<br>18-27 (85% 18-19)<br>NR<br>NR<br>NR | Investigated whether problematic SM use was related to BI, self esteem and ED symptoms/concerns | Sociocultural theory             | MultipleTwitter, IG, Pinterest | SM usage: time spent, total friends, specific SM activities<br><br>Problematic SM use: 29 item generalised problematic internet use scale | ED: EAT-26 scale<br><br>Self-esteem: The Rosenberg Self-Esteem Scale | N/A              | N/A               | Problematic SM use was significantly associated with higher BID, lower self-esteem and higher ED symptoms/concerns<br>SM investment i.e., looking at own profile, looking at others, leaving comments was | Moderate                |

| #   | Author                    | Country & World Bank Classification | Study Design | Participant characteristics                                                                                |                                                                                                               | Objectives                                                                                                                 | Underlying theoretical framework                 | Social media platform | Exposure measure (Social media use) | Outcome measure (BI/ED symptomatology)                                                          | Mediator measure | Moderator measure | Results                                                                                                                                                                                                                                                              | Quality appraisal grade |
|-----|---------------------------|-------------------------------------|--------------|------------------------------------------------------------------------------------------------------------|---------------------------------------------------------------------------------------------------------------|----------------------------------------------------------------------------------------------------------------------------|--------------------------------------------------|-----------------------|-------------------------------------|-------------------------------------------------------------------------------------------------|------------------|-------------------|----------------------------------------------------------------------------------------------------------------------------------------------------------------------------------------------------------------------------------------------------------------------|-------------------------|
|     |                           |                                     |              |                                                                                                            |                                                                                                               |                                                                                                                            |                                                  |                       |                                     |                                                                                                 |                  |                   | strongly related to BI<br>Overall SM use related to ED symptomatology<br>Gender was not a moderator                                                                                                                                                                  |                         |
| 13. | Turner and Lefevre (2017) | UK<br><br>High-income economy       | CS           | N (% F)<br>Setting<br>Age range<br>(mean +- SD)<br>BMI<br>Ethnicity<br>Sexual orientation<br>ED prevalence | 713 (96% F)<br>Online<br>18-75 (24.96 +- 8.17)<br>22.14 (H)<br>NR<br>NR<br>49% met diagnostic criteria for ON | Investigated the association between IG and orthorexia nervosa symptoms amongst a population that followed health accounts | Cultivation theory<br><br>Gratification's theory | IG                    | SM usage: frequency & duration      | Dietary choices: which of 19 foods were included in their diet<br><br>ON: ORTO-16 questionnaire | N/A              | N/A               | Higher IG was significantly associated with ON (49% prevalence amongst participants compared to <1% amongst general population)<br>Small effect size but significant at population level<br>80% IG users ranked food as first or second most frequent image category | High                    |

| #   | Author              | Country & World Bank Classification | Study Design             | Participant characteristics                                                                                |                                                                      | Objectives                                                                                                 | Underlying theoretical framework                             | Social media platform | Exposure measure (Social media use) | Outcome measure (BI/ED symptomatology)     | Mediator measure | Moderator measure | Results                                                                                                                                                                          | Quality appraisal grade |
|-----|---------------------|-------------------------------------|--------------------------|------------------------------------------------------------------------------------------------------------|----------------------------------------------------------------------|------------------------------------------------------------------------------------------------------------|--------------------------------------------------------------|-----------------------|-------------------------------------|--------------------------------------------|------------------|-------------------|----------------------------------------------------------------------------------------------------------------------------------------------------------------------------------|-------------------------|
|     |                     |                                     |                          |                                                                                                            |                                                                      |                                                                                                            |                                                              |                       |                                     |                                            |                  |                   | appearing on IG feed<br>Reference to IG 'health celebrities' with large followings, damaging dietary advice, obsessive exercise regimes<br>Age did not moderate the relationship |                         |
| 14. | Easton et al (2018) | UK<br><br>High-income economy       | Qualitative focus groups | N (% F)<br>Setting<br>Age range<br>(mean +- SD)<br>BMI<br>Ethnicity<br>Sexual orientation<br>ED prevalence | 20 (70% F)<br>University<br>18-25 (20.7, NR)<br>NR<br>NR<br>NR<br>NR | Investigated experiences of<br>Fitspiration amongst users:<br>impact on BI, emotions, behaviour and health | Social comparison theory<br><br>Impression management theory | Multiple IG, FB, YT   | SM<br>Fitspiration exposure         | BI (thoughts, emotions, behaviour, health) | N/A              | N/A               | 4 themes arose from qualitative analysis: 1) supporting positive behaviour change 2) Unrealistic and untrustworthy content 3) negative effects on emotional wellbeing 4)         | High                    |

| #  | Author               | Country & World Bank Classification | Study Design                        | Participant characteristics     |                                                   | Objectives                                          | Underlying theoretical framework | Social media platform | Exposure measure (Social media use)  | Outcome measure (BI/ED symptomatology) | Mediator measure | Moderator measure                    | Results                                                                                                                                                                                                                                                                                                      | Quality appraisal grade |
|----|----------------------|-------------------------------------|-------------------------------------|---------------------------------|---------------------------------------------------|-----------------------------------------------------|----------------------------------|-----------------------|--------------------------------------|----------------------------------------|------------------|--------------------------------------|--------------------------------------------------------------------------------------------------------------------------------------------------------------------------------------------------------------------------------------------------------------------------------------------------------------|-------------------------|
|    |                      |                                     |                                     | ce                              |                                                   |                                                     |                                  |                       |                                      |                                        |                  |                                      | vulnerabilities<br>Revealed that<br>Fitspiration can be motivating but elicits comparisons, exposure to unattainable and dangerous content, and has serious consequences for mental health<br>Effects may persist despite critical awareness of 'damaging' posts<br>This relationship was stronger for girls |                         |
| 15 | Kleemans et al 2018) | The Netherlands<br>High-            | Mixed Methods:<br>online experiment | N (% F)<br>Setting<br>Age range | 144 (100% F)<br>Secondary school<br>NR (15.92 +-) | Investigated the effect of manipulated IG photos on | Social comparison theory         | IG                    | Exposure to manipulated photos on IG | BI: The Body Image State scale         | N/A              | Social comparison tendencies:<br>The | Exposure to manipulated IG photos → BID<br>Stronger                                                                                                                                                                                                                                                          | Moderate                |

| #   | Author               | Country & World Bank Classification | Study Design | Participant characteristics                                             |                                                               | Objectives                                                                               | Underlying theoretical framework                     | Social media platform | Exposure measure (Social media use) | Outcome measure (BI/ED symptomatology)                                   | Mediator measure | Moderator measure                          | Results                                                                                                                                                                                                                                                                             | Quality appraisal grade |
|-----|----------------------|-------------------------------------|--------------|-------------------------------------------------------------------------|---------------------------------------------------------------|------------------------------------------------------------------------------------------|------------------------------------------------------|-----------------------|-------------------------------------|--------------------------------------------------------------------------|------------------|--------------------------------------------|-------------------------------------------------------------------------------------------------------------------------------------------------------------------------------------------------------------------------------------------------------------------------------------|-------------------------|
|     |                      | income economy                      | & survey     | (mean +- SD)<br>BMI<br>Ethnicity<br>Sexual orientation<br>ED prevalence | 1.16<br>NR<br>NR<br>NR                                        | adolescent girls<br>BI and whether social comparison tendency moderates the relationship | Impression management theory                         |                       |                                     |                                                                          |                  | Netherlands Comparison Orientation Measure | relationship for girls with higher social comparison tendencies (moderating factor)<br>Girls demonstrated little awareness of manipulated photos and rated them as more attractive in comparison to original photos – editing as accepted and normalised for contemporary teenagers |                         |
| 16. | Marengo et al (2018) | Italy<br><br>High-income economy    | CS           | N (% F)<br>Setting<br>Age<br>(mean +- SD)<br>BMI                        | 523 (53.5% F)<br>Secondary school<br>NR (14.82 +- 1.52)<br>NR | Investigated the association SM use (appearance focused), BI concerns and internalizing  | Sociocultural theory<br><br>Social comparison theory | Multiple IG, SC & FB  | Appearance focused SM exposure      | BI: Italian version of the Body Shape Questionnaire<br><br>Internalizing | N/A              | N/A                                        | Students report use of appearance focused SM for >2 hours per day → significantly                                                                                                                                                                                                   | Moderate                |

| #   | Author               | Country & World Bank Classification | Study Design                                             | Participant characteristics                                                      |                                                                                         | Objectives                                                                                                            | Underlying theoretical framework                                   | Social media platform | Exposure measure (Social media use)                                                                        | Outcome measure (BI/ED symptomatology)                                              | Mediator measure | Moderator measure | Results                                                                                                                                                                                                                              | Quality appraisal grade |
|-----|----------------------|-------------------------------------|----------------------------------------------------------|----------------------------------------------------------------------------------|-----------------------------------------------------------------------------------------|-----------------------------------------------------------------------------------------------------------------------|--------------------------------------------------------------------|-----------------------|------------------------------------------------------------------------------------------------------------|-------------------------------------------------------------------------------------|------------------|-------------------|--------------------------------------------------------------------------------------------------------------------------------------------------------------------------------------------------------------------------------------|-------------------------|
|     |                      |                                     |                                                          | Ethnicity<br>Sexual orientation<br>ED prevalence                                 | NR<br>NR<br>NR                                                                          | symptoms (anxiety and depression) amongst adolescents                                                                 |                                                                    |                       |                                                                                                            | symptoms: Italian self-rated version of the strength and difficulties questionnaire |                  |                   | higher BI concerns and internalising symptoms<br>This relationship was stronger for IG and SC in contrast to FB<br>Supports internalizing symptoms as an outcome comorbid with BI concerns although directionality cannot be assumed |                         |
| 17. | Raggatt et al (2018) | Australia<br>High-income economy    | Mixed Methods:<br>CS survey and open-ended questionnaire | N (% F)<br>Setting<br>Age (mean +- SD)<br>BMI<br>Ethnicity<br>Sexual orientation | 180 (84% F)<br>Online<br>NR (23 +- NR)<br>24.5 (H)<br>NR<br>NR<br>17.7% high risk of ED | Investigated the association between fitspiration, DE, exercise behaviours and psychological distress of fitspiration | Sociocultural<br><br>Social identity<br><br>Gratification's theory | General               | SM<br>Fitspiration exposure: checklist indicating type of fitspiration content and engagement levels e.g., | DE: EAT-26<br><br>Compulsive exercise behaviours:<br>Exercise Addiction Inventory   | N/A              | N/A               | 17.7% classified as high risk of an ED, 17.4% reported high levels of psychological distress, 10.3% at risk of addictive                                                                                                             | Moderate                |



| #   | Author                    | Country & World Bank Classification | Study Design | Participant characteristics                        |                                                                   | Objectives                                                                                  | Underlying theoretical framework              | Social media platform | Exposure measure (Social media use)                            | Outcome measure (BI/ED symptomatology)                          | Mediator measure                                           | Moderator measure | Results                                                                                                                                                                                                                                                                                  | Quality appraisal grade |
|-----|---------------------------|-------------------------------------|--------------|----------------------------------------------------|-------------------------------------------------------------------|---------------------------------------------------------------------------------------------|-----------------------------------------------|-----------------------|----------------------------------------------------------------|-----------------------------------------------------------------|------------------------------------------------------------|-------------------|------------------------------------------------------------------------------------------------------------------------------------------------------------------------------------------------------------------------------------------------------------------------------------------|-------------------------|
|     |                           |                                     |              | n                                                  |                                                                   | followers/users                                                                             |                                               |                       | comment, posting, scrolling                                    | Psychological distress: Kessler 10 Psychological Distress Scale |                                                            |                   | exercise behaviours<br>Positive engagement: motivation, goal setting, strength, community, reliable health information, food & exercise inspiration<br>Negative: failing to meet the ideal, anxiety, hampering ED recovery, pressure of clean eating and exercise, underqualified advice |                         |
| 18. | Saunders and Eaton (2018) | USA<br>High-income economy          | CS           | N (% F)<br>Setting<br>Age<br>range<br>(mean +- SD) | 637 (100% F)<br>University<br>18-24 (21.3 +- 1.72)<br>NR<br>67.5% | Investigated the sociocultural model of eating with theories explaining the impact of SM on | Sociocultural<br><br>Social comparison theory | Multiple: IG, SC & FB | SM use: self-report survey on motivation for usage, time spent | DE: Eating Pathology Symptoms Inventory                         | Appearance comparisons<br>: Upward and downward comparison | N/A               | Significant positive relationship between upward comparison and DE outcomes                                                                                                                                                                                                              | Moderate                |

| #   | Author                 | Country & World Bank Classification | Study Design | Participant characteristics                                 |                                                                                                             | Objectives                                            | Underlying theoretical framework                 | Social media platform | Exposure measure (Social media use)           | Outcome measure (BI/ED symptomatology)               | Mediator measure                                                                                       | Moderator measure | Results                                                                                                                                                                                                                                                                                         | Quality appraisal grade |
|-----|------------------------|-------------------------------------|--------------|-------------------------------------------------------------|-------------------------------------------------------------------------------------------------------------|-------------------------------------------------------|--------------------------------------------------|-----------------------|-----------------------------------------------|------------------------------------------------------|--------------------------------------------------------------------------------------------------------|-------------------|-------------------------------------------------------------------------------------------------------------------------------------------------------------------------------------------------------------------------------------------------------------------------------------------------|-------------------------|
|     |                        |                                     |              | BMI<br>Ethnicity<br><br>Sexual orientation<br>ED prevalence | Hispanic white, 12.4% non-Hispanic white, 12.6% Black, 2.5% Asian, 3.5% multiracial, 1.6% Other<br>NR<br>NR | the development of DE for users of three SM platforms | Objectification theory<br><br>Cultivation theory |                       |                                               |                                                      | scale<br><br>Body surveillance: body surveillance subscale of the Objectified Body Consciousness Scale |                   | and between body surveillance and DE outcomes (mediators)<br>Stronger relationships for IG & SC (appearance focused platforms)<br>Significant association between BID, binge eating and cognitive restraint (supports BI as a mediator)<br>IG as the most popular platform to be seen by others |                         |
| 19. | Tiggemann et al (2018) | Australia<br><br>High-income        | Experimental | N (% F)<br>Setting<br>Age range                             | 220 (100% F)<br>University<br>NR (20.13 +- 2.58)                                                            | Investigated the relationship between SM investment   | Social comparison theory                         | IG                    | SM use: self-report survey<br><br>Exposure to | Body & facial dissatisfaction: Heinberg and Thompson | Appearance comparison: Tiggemann and McGill                                                            | N/A               | Number of likes had no impact on appearance comparison,                                                                                                                                                                                                                                         | Moderate                |

| #   | Author                         | Country & World Bank Classification | Study Design | Participant characteristics                                                                      |                                                                                                                       | Objectives                                                                                                 | Underlying theoretical framework                           | Social media platform               | Exposure measure (Social media use) | Outcome measure (BI/ED symptomatology)                                                                 | Mediator measure                         | Moderator measure     | Results                                                                                                                                                                                                              | Quality appraisal grade |
|-----|--------------------------------|-------------------------------------|--------------|--------------------------------------------------------------------------------------------------|-----------------------------------------------------------------------------------------------------------------------|------------------------------------------------------------------------------------------------------------|------------------------------------------------------------|-------------------------------------|-------------------------------------|--------------------------------------------------------------------------------------------------------|------------------------------------------|-----------------------|----------------------------------------------------------------------------------------------------------------------------------------------------------------------------------------------------------------------|-------------------------|
|     |                                | economy                             |              | (mean +- SD)<br>BMI<br>Ethnicity<br><br>Sexual orientation<br>ED prevalence                      | 23.40 (H)<br>67.5% White,<br>23.2% Asian,<br>2.3% African,<br>1.4% Aboriginal,<br>5.9% 'other'<br>NR<br>NR            | ('likes' on IG) and women's BI                                                                             | Impression management theory<br><br>Gratification's theory |                                     | IG photos                           | (1995) visual analogue scale                                                                           | (2004) State Appearance Comparison Scale |                       | body dissatisfaction or facial dissatisfaction but led to facial satisfaction BUT investment in likes → appearance comparison → facial dissatisfaction (Supports gratification theory)<br>There was no impact on BID |                         |
| 20. | Aparicio-Martinez et al (2019) | Spain<br><br>High-income economy    | CS           | N (% F)<br>Setting<br>Age<br>Age range<br>(mean +- SD)<br>BMI<br>Ethnicity<br>Sexual orientation | 168 (100% F)<br>University<br>18-25 (20 +- 0.76)<br>NR<br>96.7% White<br>NR<br>NR but 28.5% demonstrated DE attitudes | Investigated the relationship between SM usage, BI and whether this is moderated by levels of testosterone | Social comparison theory<br><br>Objectification theory     | Multiple<br>Twitter, FB, IG, YT, SC | SM use: self-report survey          | DE: EAT-26 tool<br><br>BI: Body satisfaction questionnaire<br><br>SE: Rosenberg survey for self esteem | N/A                                      | Prenatal testosterone | 28.5% of females had DE attitudes: 38.7% presented BN symptoms and 20.5% reported dieting<br>DE attitudes were significantly associated with                                                                         | Moderate                |

| #   | Author             | Country & World Bank Classification | Study Design      | Participant characteristics |                        | Objectives                   | Underlying theoretical framework | Social media platform | Exposure measure (Social media use) | Outcome measure (BI/ED symptomatology) | Mediator measure | Moderator measure | Results                                                                                                                                                                                                                                                                                                                           | Quality appraisal grade |
|-----|--------------------|-------------------------------------|-------------------|-----------------------------|------------------------|------------------------------|----------------------------------|-----------------------|-------------------------------------|----------------------------------------|------------------|-------------------|-----------------------------------------------------------------------------------------------------------------------------------------------------------------------------------------------------------------------------------------------------------------------------------------------------------------------------------|-------------------------|
|     |                    |                                     |                   | n                           |                        |                              |                                  |                       |                                     |                                        |                  |                   | SE, BI, desired body (93% wanted to change 3 zones of body) and SM use- directionality not assumed<br>Addiction to SM (problematic use) & Prenatal testosterone was a moderator: higher levels → decreased association between SM use, BID and DE behaviours<br>Self-esteem and thin ideal internalization as plausible mediators |                         |
| 21. | Baker et al (2019) | US                                  | Qualitative focus | N (% F) Setting             | 27 (100% F) University | Investigated the association | Sociocultural theory             | IG                    | IG usage: self-reported             | Perceptions related to IG              | N/A              | N/A               | Students heavily invested in SM                                                                                                                                                                                                                                                                                                   | Moderate                |

| # | Author | Country & World Bank Classification | Study Design | Participant characteristics |                   | Objectives                                        | Underlying theoretical framework                     | Social media platform | Exposure measure (Social media use) | Outcome measure (BI/ED symptomatology)                           | Mediator measure | Moderator measure | Results                                                                                                                                                                                                                                                                                                                                                                                      | Quality appraisal grade |
|---|--------|-------------------------------------|--------------|-----------------------------|-------------------|---------------------------------------------------|------------------------------------------------------|-----------------------|-------------------------------------|------------------------------------------------------------------|------------------|-------------------|----------------------------------------------------------------------------------------------------------------------------------------------------------------------------------------------------------------------------------------------------------------------------------------------------------------------------------------------------------------------------------------------|-------------------------|
|   |        | High-income economy                 | groups       | Age (mean +- SD)            | 18-22 (20 +- 1.2) | between IG use and BI amongst university students | Gratification's theory<br><br>Objectification theory |                       | and discussed                       | usage, importance of specific functions e.g., likes & body image |                  |                   | posts, selected the most flattering photos, edited others, sought out 'likes', and deleted photos when they did not receive enough<br><br>Demonstrated pressure to adhere to societal beauty ideals, comparison with other IG users, imitating photos of 'attractive' others, feeling ugly, placing greater emphasis on online identity, internalising 3 <sup>rd</sup> person perspective of |                         |

| #   | Author                | Country & World Bank Classification  | Study Design | Participant characteristics                                                                              |                                                                                                                                        | Objectives                                                                                                                                       | Underlying theoretical framework                                                                                         | Social media platform | Exposure measure (Social media use)                                       | Outcome measure (BI/ED symptomatology)               | Mediator measure                                                                                                            | Moderator measure                                                                          | Results                                                                                                                                                                                                                                                                                                               | Quality appraisal grade |
|-----|-----------------------|--------------------------------------|--------------|----------------------------------------------------------------------------------------------------------|----------------------------------------------------------------------------------------------------------------------------------------|--------------------------------------------------------------------------------------------------------------------------------------------------|--------------------------------------------------------------------------------------------------------------------------|-----------------------|---------------------------------------------------------------------------|------------------------------------------------------|-----------------------------------------------------------------------------------------------------------------------------|--------------------------------------------------------------------------------------------|-----------------------------------------------------------------------------------------------------------------------------------------------------------------------------------------------------------------------------------------------------------------------------------------------------------------------|-------------------------|
|     |                       |                                      |              |                                                                                                          |                                                                                                                                        |                                                                                                                                                  |                                                                                                                          |                       |                                                                           |                                                      |                                                                                                                             |                                                                                            | the self                                                                                                                                                                                                                                                                                                              |                         |
| 22. | Chang et al (2019)    | Singapore<br><br>High-income economy | CS           | N (% F)<br>Setting<br>Age<br>(mean +- SD)<br>BMI<br>Ethnicity<br><br>Sexual orientation<br>ED prevalence | 303 (100% F)<br>Secondary school<br>12-16 (NR)<br>NR<br>Chinese (72%), Malay (14%), Indian (8%), Eurasian (1%), Other (1%)<br>NR<br>NR | Investigated the association between adolescents' girls IG selfie* practices and BI<br><br>Mediating role of appearance comparisons was examined | Social comparison theory<br><br>Objectification theory<br><br>Impression management theory<br><br>Social identity theory | IG                    | Selfie practices on IG: three types of selfie related activities explored | BI: Mendelson, White & Mendelson's Body Esteem Scale | Peer appearance comparisons : three items adapted from the Thompson, Heinberg and Tantleff-Dunn's Physical Comparison Scale | Direction of appearance comparisons : two items adapted from Fardouly and Vartanian (2015) | Photo browsing → negative body esteem which was mediated by peer comparison<br>Photo posting → positive body esteem (posting 'best image' of oneself and receiving positive peer feedback may boost confidence and BI)<br>Peer comparisons mediated both relationships<br>Direction of comparison was not a moderator | Moderate                |
| 23. | De Vries et al (2019) | The Netherlands                      | CS           | N (% F)<br>Setting<br>Age                                                                                | 440 (47% F)<br>Secondary school                                                                                                        | Investigated the association between SM use                                                                                                      | Sociocultural theory                                                                                                     | FB                    | SM use:<br>Adapted version of the                                         | BID: Body dissatisfaction subscale of the            | N/A                                                                                                                         | Positive mother/father-adolescent                                                          | SM use was significantly associated with                                                                                                                                                                                                                                                                              | High                    |

| #   | Author                | Country & World Bank Classification  | Study Design | Participant characteristics                                                            |                                                                                    | Objectives                                                                                                                                          | Underlying theoretical framework                           | Social media platform | Exposure measure (Social media use)      | Outcome measure (BI/ED symptomatology)                                        | Mediator measure                                                                     | Moderator measure                                                        | Results                                                                                                                                                                                                                                | Quality appraisal grade |
|-----|-----------------------|--------------------------------------|--------------|----------------------------------------------------------------------------------------|------------------------------------------------------------------------------------|-----------------------------------------------------------------------------------------------------------------------------------------------------|------------------------------------------------------------|-----------------------|------------------------------------------|-------------------------------------------------------------------------------|--------------------------------------------------------------------------------------|--------------------------------------------------------------------------|----------------------------------------------------------------------------------------------------------------------------------------------------------------------------------------------------------------------------------------|-------------------------|
|     |                       | High-income economy                  |              | (mean +- SD)<br>BMI<br>Ethnicity<br>Sexual orientation<br>ED prevalence                | 12-19 (14.86 +- 1.79)<br>NR<br>NR<br>NR<br>NR                                      | and BI and whether gender and positive mother/father-adolescent relationships moderated the relationship                                            |                                                            |                       | Multidimensional Scale of FB use         | Body Attitude Test                                                            |                                                                                      | relationships : The Network of Relationships Questionnaire<br><br>Gender | BID, but this relationship was weaker for adolescents with positive mother-adolescent relationships (moderator)<br>Positive father-adolescent relationships did not moderate the association<br>Gender was not a significant moderator |                         |
| 24. | Lonergan et al (2019) | Australia<br><br>High-income economy | CS           | N (% F)<br>Setting<br>Age (mean +- SD)<br>BMI<br>Ethnicity<br>Sexual orientation<br>ED | 184 (52.6% F)<br>University<br>17-40 (20.13+- 3.43)<br>20.13 (H)<br>NR<br>NR<br>NR | Investigated the relationship between manipulation of selfies, investment in other's responses to selfies & BID<br>Also explored if self-compassion | Impression management theory<br><br>Gratification's theory | General               | SM use: self-report usage and activities | BID: 16-item self-report adapted version of the Body Shape Satisfaction Scale | Photo manipulation and photo investment:<br>Photo manipulation and investment scales | Self-compassion:<br>The 12-item Self-Compassion Scale Short-Form         | SM photo manipulation and investment was significantly associated with BID for both genders, but directionality of relationship not assumed (i.e. BID → SM)                                                                            | High                    |

| #   | Author               | Country & World Bank Classification | Study Design            | Participant characteristics                                                                       |                                                                           | Objectives                                                                                                     | Underlying theoretical framework | Social media platform | Exposure measure (Social media use)   | Outcome measure (BI/ED symptomatology)                                                         | Mediator measure | Moderator measure | Results                                                                                                                                                                                                     | Quality appraisal grade |
|-----|----------------------|-------------------------------------|-------------------------|---------------------------------------------------------------------------------------------------|---------------------------------------------------------------------------|----------------------------------------------------------------------------------------------------------------|----------------------------------|-----------------------|---------------------------------------|------------------------------------------------------------------------------------------------|------------------|-------------------|-------------------------------------------------------------------------------------------------------------------------------------------------------------------------------------------------------------|-------------------------|
|     |                      |                                     |                         | prevalence                                                                                        |                                                                           | moderated the relationship                                                                                     |                                  |                       |                                       |                                                                                                |                  |                   | photo manipulation and investment or SM photo manipulation and investment → BID)<br>Self-compassion did not moderate the relationship                                                                       |                         |
| 25. | Wiklund et al (2019) | Sweden<br>High-income economy       | Qualitative: interviews | N (% F)<br>Setting<br>Age (mean +- SD)<br>BMI<br>Ethnicity<br>Sexual orientation<br>ED prevalence | 36 (NR)<br>Secondary school<br>16-18 (17.7 +- NR)<br>NR<br>NR<br>NR<br>NR | Explored the topic of SM in relation to norms, ideals regarding body appearance, exercise, and knowledge of ON | Sociocultural theory             | General               | SM use: self-report during interviews | Perceptions of healthism, social media, norms, ideals regarding body image and knowledge of ON | N/A              | N/A               | SM as setting the standard: promoting unattainable fitness standards, thin/fit ideal, fitness fixation, extreme exercise, and competition<br>Adhering as part of a quest for social recognition, value, and | High                    |



| #   | Author               | Country & World Bank Classification | Study Design | Participant characteristics                                                                              |                                                                                                                                       | Objectives                                                                      | Underlying theoretical framework                     | Social media platform | Exposure measure (Social media use)                                                                               | Outcome measure (BI/ED symptomatology) | Mediator measure | Moderator measure | Results                                                                                                                                                                                                             | Quality appraisal grade |
|-----|----------------------|-------------------------------------|--------------|----------------------------------------------------------------------------------------------------------|---------------------------------------------------------------------------------------------------------------------------------------|---------------------------------------------------------------------------------|------------------------------------------------------|-----------------------|-------------------------------------------------------------------------------------------------------------------|----------------------------------------|------------------|-------------------|---------------------------------------------------------------------------------------------------------------------------------------------------------------------------------------------------------------------|-------------------------|
|     |                      |                                     |              |                                                                                                          |                                                                                                                                       |                                                                                 |                                                      |                       |                                                                                                                   |                                        |                  |                   | status- achieved through the body<br>Falling short of the ideal → alienation, imperfection<br>Pressure for girls to appear slim and toned BUT not too muscular (aesthetic goals of 'fitspiration')                  |                         |
| 26. | Bennett et al (2020) | US<br><br>High-income economy       | EMA          | N (% F)<br>Setting<br>Age<br>(mean +- SD)<br>BMI<br>Ethnicity<br><br>Sexual orientation<br>ED prevalence | 30 (100% F)<br>University<br>NR (18.52 +- 0.87)<br>22.37 (H)<br>89.7% White, Hispanic (3.4%), Asian American/Asian (3.4%)<br>NR<br>NR | Investigated the effects of SM consumption on BID and negative affect using EMA | Sociocultural theory<br><br>Social comparison theory | General               | SM consumption: EMA-compatible social media consumption questionnaire (time spent and social media type consumed) | BI: The Body Image States Scale        | N/A              | N/A               | Number of SM sites visited was a significant predictor of BID whilst time spent using SM was not<br>Both number of sites visited, and time spent on SM were significant predictors of negative affect, sadness, and | Moderate                |

| #   | Author                    | Country & World Bank Classification | Study Design  | Participant characteristics                                                                              |                                                                                                                               | Objectives                                                                                                                                                                                                                      | Underlying theoretical framework | Social media platform                              | Exposure measure (Social media use)                                                                                                                                              | Outcome measure (BI/ED symptomatology)                                                           | Mediator measure | Moderator measure | Results                                                                                                                                                                                                                                                                                                                   | Quality appraisal grade |
|-----|---------------------------|-------------------------------------|---------------|----------------------------------------------------------------------------------------------------------|-------------------------------------------------------------------------------------------------------------------------------|---------------------------------------------------------------------------------------------------------------------------------------------------------------------------------------------------------------------------------|----------------------------------|----------------------------------------------------|----------------------------------------------------------------------------------------------------------------------------------------------------------------------------------|--------------------------------------------------------------------------------------------------|------------------|-------------------|---------------------------------------------------------------------------------------------------------------------------------------------------------------------------------------------------------------------------------------------------------------------------------------------------------------------------|-------------------------|
|     |                           |                                     |               |                                                                                                          |                                                                                                                               |                                                                                                                                                                                                                                 |                                  |                                                    |                                                                                                                                                                                  |                                                                                                  |                  |                   | guilt<br>100% of participants endorsed SM use                                                                                                                                                                                                                                                                             |                         |
| 27. | Cavazos-Rehg et al (2020) | US<br>High-income economy           | Mixed methods | N (% F)<br>Setting<br>Age<br>(mean +- SD)<br>BMI<br>Ethnicity<br><br>Sexual orientation<br>ED prevalence | 598 (77.6% F)<br>Online<br>NR (19.77 +- 5.03)<br>NR<br>69.06% White<br>American<br>NR<br>59.8% subclinical,<br>23.7% clinical | Investigated the self-reported advantages and disadvantages of SM related to BI/EDs and the openness of participants to online outreach and ED support. All participants endorsed posting or following the fit/thin ideal on SM | Sociocultural theory             | MultipleTwitter, FB, SC, IG, Tumblr, YT, Pinterest | Exposure to thin ideal content on SM: self-report questionnaire on posting, following, engagement in past month<br>96% had seen content, 96% followed it and 71% posted about it | DE: Stanford Fashington ED screening based on DSM-5 criteria<br><br>Social support questionnaire | N/A              | N/A               | General advantages: motivation to be thin, engage in exercise, work out, restrict eating, recover, and seek treatment (2.9%)<br>Amongst the clinical or subclinical ED group – higher proportion of people claimed that the motivation to be thin and restrict diet compared to groups without an ED (vulnerability). All | Moderate                |

| # | Author | Country & World Bank Classification | Study Design | Participant characteristics | Objectives | Underlying theoretical framework | Social media platform | Exposure measure (Social media use) | Outcome measure (BI/ED symptomatology) | Mediator measure | Moderator measure | Results                                                                                                                                                                                                                                                                                                                                                                         | Quality appraisal grade |
|---|--------|-------------------------------------|--------------|-----------------------------|------------|----------------------------------|-----------------------|-------------------------------------|----------------------------------------|------------------|-------------------|---------------------------------------------------------------------------------------------------------------------------------------------------------------------------------------------------------------------------------------------------------------------------------------------------------------------------------------------------------------------------------|-------------------------|
|   |        |                                     |              |                             |            |                                  |                       |                                     |                                        |                  |                   | <p>participants reported that SM is risk for ED symptomatology and pressure for thinness.</p> <p>General disadvantages: content elicits low self-esteem (61.31%), mentioning anxiety or depression, dealing with other reactions e.g., fear of judgement, lack of comments and likes, trigger to engage in ED behaviour, pressure to be thin, engaging in body comparisons,</p> |                         |

| #   | Author                       | Country & World Bank Classification | Study Design | Participant characteristics                                                                              |                                                                                                                                             | Objectives                                                                                                         | Underlying theoretical framework                   | Social media platform | Exposure measure (Social media use) | Outcome measure (BI/ED symptomatology)                                        | Mediator measure                                                                                                                                                                                         | Moderator measure | Results                                                                                                                                                                                                                                                                                        | Quality appraisal grade |
|-----|------------------------------|-------------------------------------|--------------|----------------------------------------------------------------------------------------------------------|---------------------------------------------------------------------------------------------------------------------------------------------|--------------------------------------------------------------------------------------------------------------------|----------------------------------------------------|-----------------------|-------------------------------------|-------------------------------------------------------------------------------|----------------------------------------------------------------------------------------------------------------------------------------------------------------------------------------------------------|-------------------|------------------------------------------------------------------------------------------------------------------------------------------------------------------------------------------------------------------------------------------------------------------------------------------------|-------------------------|
|     |                              |                                     |              |                                                                                                          |                                                                                                                                             |                                                                                                                    |                                                    |                       |                                     |                                                                               |                                                                                                                                                                                                          |                   | obsessing over body size.                                                                                                                                                                                                                                                                      |                         |
| 28. | Choukas-Bradley et al (2020) | US<br>High-income economy           | CS           | N (% F)<br>Setting<br>Age<br>(mean +- SD)<br>BMI<br>Ethnicity<br><br>Sexual orientation<br>ED prevalence | 226 (58.4%)<br>Secondary school<br>NR (16.25 +- NR)<br>NR<br>45.6% White American,<br>24.3% African American,<br>25.2% Hispanic<br>NR<br>NR | Investigated the association between Appearance Related Social Media Consciousness* and DE and depressive symptoms | Sociocultural theory<br><br>Objectification theory | General               | SM usage: self-reported time spent  | DE: EDE-QS questionnaire<br><br>Depression: Depressive symptoms questionnaire | Body comparison: BEECOM scale<br><br>Appearance related social media consciousness scale<br><br>Body surveillance and body shame: Objectified Body Consciousness Scale<br><br>Self-Objectification: Self | Gender            | Higher ARSMC → higher depressive symptoms for girls and boys<br>Higher ARSMC → DE amongst girls only<br>96% girls and 91% boys reported engaging in ARSMC on SM-curating photos, scrutinizing them, imaging how one appears to others-supporting body surveillance and self-objectification as | Moderate                |

| #   | Author                         | Country & World Bank Classification | Study Design | Participant characteristics                                                                                |                                                                                                                                                                                         | Objectives                                                                                                                                                         | Underlying theoretical framework | Social media platform                           | Exposure measure (Social media use)                     | Outcome measure (BI/ED symptomatology)                                                                                                      | Mediator measure                            | Moderator measure | Results                                                                                                                                                                                                                                                                     | Quality appraisal grade |
|-----|--------------------------------|-------------------------------------|--------------|------------------------------------------------------------------------------------------------------------|-----------------------------------------------------------------------------------------------------------------------------------------------------------------------------------------|--------------------------------------------------------------------------------------------------------------------------------------------------------------------|----------------------------------|-------------------------------------------------|---------------------------------------------------------|---------------------------------------------------------------------------------------------------------------------------------------------|---------------------------------------------|-------------------|-----------------------------------------------------------------------------------------------------------------------------------------------------------------------------------------------------------------------------------------------------------------------------|-------------------------|
|     |                                |                                     |              |                                                                                                            |                                                                                                                                                                                         |                                                                                                                                                                    |                                  |                                                 |                                                         |                                                                                                                                             | Objectification Behaviours and Belief scale |                   | a plausible mediator                                                                                                                                                                                                                                                        |                         |
| 29. | Fitzsimmons-Craft et al (2020) | US<br>High-income economy           | CS           | N (% F)<br>Setting<br>Age range<br>(mean +- SD)<br>BMI<br>Ethnicity<br>Sexual orientation<br>ED prevalence | 408 (100% F)<br>Online<br>15-25 (59% NR)<br>15-17 years +- NR<br>65% White<br>American<br>NR<br>84% met criteria for clinical/subclinical EDs and all engaged with pro-ED content on SM | Investigated exposure to BI content emphasising the thin ideal on SM and probably ED diagnosis ED-related QOL and psychiatric comorbidities (depression & anxiety) | Sociocultural theory             | MultipleTwitter, FB, SC, IG, Tumblr, YT, Reddit | Thin ideal exposure on SM: three-item self-report scale | DE: Stanford Washington ED Screening and the ED Quality Of Life Instrument<br><br>Psychological comorbidities: Patient Health Questionnaire | N/A                                         | Age               | 96% followed at least one account that posted thinspiration content, 96% saw peers post about eating/weight/BI, 72% posted about the thin-ideal<br><br>84% met the criteria for clinical/subclinical ED but only 14% had received treatment for eating problems in the past | Moderate                |

| #   | Author             | Country & World Bank Classification | Study Design | Participant characteristics                                                           |                                                                       | Objectives                                                                                                                                  | Underlying theoretical framework                           | Social media platform | Exposure measure (Social media use) | Outcome measure (BI/ED symptomatology)                                                     | Mediator measure                                                        | Moderator measure                                                                        | Results                                                                                                                                                                                                                                        | Quality appraisal grade |
|-----|--------------------|-------------------------------------|--------------|---------------------------------------------------------------------------------------|-----------------------------------------------------------------------|---------------------------------------------------------------------------------------------------------------------------------------------|------------------------------------------------------------|-----------------------|-------------------------------------|--------------------------------------------------------------------------------------------|-------------------------------------------------------------------------|------------------------------------------------------------------------------------------|------------------------------------------------------------------------------------------------------------------------------------------------------------------------------------------------------------------------------------------------|-------------------------|
|     |                    |                                     |              |                                                                                       |                                                                       |                                                                                                                                             |                                                            |                       |                                     |                                                                                            |                                                                         |                                                                                          | month (fear of judgement, lack of trust, problem not perceived as serious enough)<br>71% reported symptoms consistent with depression & 65% of moderate anxiety<br>Strong support for the relationship between pro-ED content and ED diagnoses |                         |
| 30. | Gioia et al (2020) | Italy<br><br>High-income economy    | CS           | N (% F)<br>Setting<br>Age range (mean +- SD)<br>BMI<br>Ethnicity<br>Sexual orientatio | 693 (55% F)<br>Secondary school<br>13-19 (19 +- NR)<br>NR<br>NR<br>NR | Investigated the association between problematic social media use, body image control in photos (manipulation) and body shame (tested as an | Objectification theory<br><br>Impression management theory | General               | Problematic SM usage: self-reported | Body Shame: 8-item Body Shame subscale of the Italian Objectified Body Consciousness Scale | Body image control: Body Image Control in Photos-Revised Scale (BICP-R) | Gender<br>Pre-existing Body Shame: 8-item Body Shame subscale of the Italian Objectified | Body shame significantly predicted image control in SM photos and engagement in Problematic SM use for both males and females                                                                                                                  | Low                     |

| #   | Author     | Country & World Bank Classification | Study Design | Participant characteristics |             | Objectives               | Underlying theoretical framework | Social media platform | Exposure measure (Social media use) | Outcome measure (BI/ED symptomatology) | Mediator measure | Moderator measure        | Results                                                                                                                                                                                                                                                                                                                   | Quality appraisal grade |
|-----|------------|-------------------------------------|--------------|-----------------------------|-------------|--------------------------|----------------------------------|-----------------------|-------------------------------------|----------------------------------------|------------------|--------------------------|---------------------------------------------------------------------------------------------------------------------------------------------------------------------------------------------------------------------------------------------------------------------------------------------------------------------------|-------------------------|
|     |            |                                     |              | n                           |             | outcome and a moderator) |                                  |                       |                                     |                                        |                  | Body Consciousness Scale | Hypothetically implies that body shame → Problematic SM use and photo investment - - - > Self objectification BUT directionality cannot be assumed (supports potential bidirectional relationship) Young women had higher rates of body shame, engaged in more problematic SM use, and invested heavily in self-portraits |                         |
| 31. | Krug et al | Australia                           | EMA          | N (% F)                     | 85 (100% F) | Investigated the         | Tripartite                       | IG                    | Exposure to                         | Mood: single                           | Thin ideal       | Trait body               | Exposure to                                                                                                                                                                                                                                                                                                               | High                    |

| #   | Author                | Country & World Bank Classification  | Study Design | Participant characteristics                                                                      |                                                                                                                  | Objectives                                                                                                                                                                                | Underlying theoretical framework | Social media platform  | Exposure measure (Social media use)           | Outcome measure (BI/ED symptomatology)                                                                                  | Mediator measure                                                                                                                                                                    | Moderator measure                                                                                                                                                                                          | Results                                                                                                                                                                                                             | Quality appraisal grade |
|-----|-----------------------|--------------------------------------|--------------|--------------------------------------------------------------------------------------------------|------------------------------------------------------------------------------------------------------------------|-------------------------------------------------------------------------------------------------------------------------------------------------------------------------------------------|----------------------------------|------------------------|-----------------------------------------------|-------------------------------------------------------------------------------------------------------------------------|-------------------------------------------------------------------------------------------------------------------------------------------------------------------------------------|------------------------------------------------------------------------------------------------------------------------------------------------------------------------------------------------------------|---------------------------------------------------------------------------------------------------------------------------------------------------------------------------------------------------------------------|-------------------------|
|     | (2020)                | High-income economy                  |              | Setting<br>Age range (mean +- SD)<br>BMI<br>Ethnicity<br><br>Sexual orientation<br>ED prevalence | Community NR (19.68 +- 3.06)<br>22.06 (H)<br>41.2% White, 44.7% Asian, 4.7% Mediterranean, 2.4% African NR<br>NR | impact of fitspiration images (relative to neutral) on BI, mood and DE and whether trait BID, thin-ideal internalization and pressures from media, family & peers moderated these effects | influence model                  |                        | fitspiration images using EMA                 | item approach with responses on 10-point scale<br><br>DE: engagement in DE behaviours adapted from previous EMA studies | internalization: The Sociocultural Attitudes towards appearance questionnaire (SATAQ-4)<br><br>Appearance comparison: The Physical Appearance and Comparison Scale-Revised (PACS-R) | dissatisfaction: Body Image Dissatisfaction subscale of the body change inventory (BCI)<br><br>Pressures from media, family, and peers: self-reported<br><br>Thin/fit ideal internalization: self-reported | fitspiration images led to significantly higher perceived pressure to attain an idealised physique and decreased satisfaction with current fitness<br><br>Led to no significant effect on mood or disordered eating |                         |
| 32. | Lonergan et al (2020) | Australia<br><br>High-income economy | CS           | N (% F)<br>Setting<br>Age (mean +- SD)<br>BMI                                                    | 4,209 (53.13% F)<br>Secondary school<br>11-19 (14.97 +- NR)                                                      | Investigated whether SM behaviours were associated with higher odds of meeting criteria                                                                                                   | Impression management theory     | Multiple (image-based) | SM usage: self-report on image-based SM usage | ED diagnosis: Eating Disorder Examination Questionnaire (EDE-Q version 6)                                               | Social media activities: avoidance of posting selfies, photo                                                                                                                        | Gender                                                                                                                                                                                                     | Found that each SM behaviour was associated with greater likelihood of meeting criteria                                                                                                                             | High                    |



| # | Author | Country & World Bank Classification | Study Design | Participant characteristics                      |                                                                    | Objectives                                             | Underlying theoretical framework | Social media platform | Exposure measure (Social media use) | Outcome measure (BI/ED symptomatology)                      | Mediator measure                                              | Moderator measure | Results                                                                                                                                                                                                                                                                                                                                                                                    | Quality appraisal grade |
|---|--------|-------------------------------------|--------------|--------------------------------------------------|--------------------------------------------------------------------|--------------------------------------------------------|----------------------------------|-----------------------|-------------------------------------|-------------------------------------------------------------|---------------------------------------------------------------|-------------------|--------------------------------------------------------------------------------------------------------------------------------------------------------------------------------------------------------------------------------------------------------------------------------------------------------------------------------------------------------------------------------------------|-------------------------|
|   |        |                                     |              | Ethnicity<br>Sexual orientation<br>ED prevalence | 64.4% boys & 67.3% girls in 'healthy' percentile<br>NR<br>NR<br>NR | for an ED & whether gender moderated this relationship |                                  |                       |                                     | Psychological distress: K10<br>Psychological Distress Scale | investment, photo manipulation, investment in other's selfies |                   | for one or more EDs (clinical and subclinical BN and night eating syndrome) when adjusting for demographic factors<br>Suggests that effort into choosing a selfie, editing images and monitoring comments & likes are pervasive SM behaviours in adolescents who meet the criteria for an ED – ED symptomatology (overvaluation) manifesting virtually in SM behaviours<br>Suggestive that |                         |

| #   | Author                | Country & World Bank Classification  | Study Design | Participant characteristics                                                                              |                                                                                                                                          | Objectives                                                                                                           | Underlying theoretical framework                     | Social media platform | Exposure measure (Social media use)                                                                                                                                          | Outcome measure (BI/ED symptomatology)                                                                                                       | Mediator measure | Moderator measure | Results                                                                                                                                                                                                                                   | Quality appraisal grade |
|-----|-----------------------|--------------------------------------|--------------|----------------------------------------------------------------------------------------------------------|------------------------------------------------------------------------------------------------------------------------------------------|----------------------------------------------------------------------------------------------------------------------|------------------------------------------------------|-----------------------|------------------------------------------------------------------------------------------------------------------------------------------------------------------------------|----------------------------------------------------------------------------------------------------------------------------------------------|------------------|-------------------|-------------------------------------------------------------------------------------------------------------------------------------------------------------------------------------------------------------------------------------------|-------------------------|
|     |                       |                                      |              |                                                                                                          |                                                                                                                                          |                                                                                                                      |                                                      |                       |                                                                                                                                                                              |                                                                                                                                              |                  |                   | ED risk prone adolescents engage in certain SM activities which maintains or exacerbates their disorder                                                                                                                                   |                         |
| 33. | Prichard et al (2020) | Australia<br><br>High-income economy | Experimental | N (% F)<br>Setting<br>Age<br>(mean +- SD)<br>BMI<br>Ethnicity<br><br>Sexual orientation<br>ED prevalence | 108 (100% F)<br>University<br>17-25 (20.24+-1.86)<br>23.02 (H)<br>White 64.8%,<br>Asian 27.8%,<br>Indian 3.7%,<br>2.8% other<br>NR<br>NR | Investigated the effect of exposure to fitspiration images via IG on mood, BID and exercise behaviour in young women | Sociocultural theory<br><br>Social Comparison Theory | IG                    | Experimental exposure to fitspiration imagery: randomly assigned to fitspiration or travel images followed by exercise or rest<br><br>SM usage: frequency and time spent/day | Mood & BID: Visual analogue scales<br><br>Exercise behaviour: distance travelled on treadmill and perceived exertion in 10-minute time frame | N/A              | N/A               | Exposure to fitspiration resulted in significantly higher negative mood & BID relative to control travel images<br><br>There was no difference in exercise behaviour between the two groups: fitspiration did not motivate exercise (main | Moderate                |

| #   | Author               | Country & World Bank Classification  | Study Design | Participant characteristics                                                                          |                                                                               | Objectives                                                                                                                                                                                                                                                               | Underlying theoretical framework | Social media platform                                        | Exposure measure (Social media use) | Outcome measure (BI/ED symptomatology)                                                                                                 | Mediator measure                                                                                                        | Moderator measure                                                                                                                                                                                      | Results                                                                                                                                                                                                                                                                                                                | Quality appraisal grade |
|-----|----------------------|--------------------------------------|--------------|------------------------------------------------------------------------------------------------------|-------------------------------------------------------------------------------|--------------------------------------------------------------------------------------------------------------------------------------------------------------------------------------------------------------------------------------------------------------------------|----------------------------------|--------------------------------------------------------------|-------------------------------------|----------------------------------------------------------------------------------------------------------------------------------------|-------------------------------------------------------------------------------------------------------------------------|--------------------------------------------------------------------------------------------------------------------------------------------------------------------------------------------------------|------------------------------------------------------------------------------------------------------------------------------------------------------------------------------------------------------------------------------------------------------------------------------------------------------------------------|-------------------------|
|     |                      |                                      |              |                                                                                                      |                                                                               |                                                                                                                                                                                                                                                                          |                                  |                                                              |                                     |                                                                                                                                        |                                                                                                                         |                                                                                                                                                                                                        | 'goal' of fitspiration)                                                                                                                                                                                                                                                                                                |                         |
| 34. | Rodgers et al (2020) | Australia<br><br>High-income economy | CS           | N (% F)<br>Setting<br>Age<br>(mean +- SD)<br>BMI<br>Ethnicity<br>Sexual orientation<br>ED prevalence | 681 (49% F)<br>Secondary school<br>NR (12.76 +- 0.74)<br>NR<br>NR<br>NR<br>NR | Investigated the association between SM use and BI concerns and body changing behaviours<br><br>Explored internalization of thin/fit ideal and upward appearance comparisons<br><br>Assessed whether this may be moderated by negative affect (depression & self-esteem) | Biopsychosocial model            | Multiple: SC, IG, FB, YT<br>Twitter,<br>Tumblr,<br>Pinterest | SM usage: self-report questionnaire | BID: subscale from the Eating Disorders Examination Questionnaire (EDE-Q)<br><br>Muscle building behaviours: The Body Change Inventory | Internalization of appearance ideals: Muscular subscale of the Sociocultural Attitudes towards appearance questionnaire | Depression: Center for Epidemiologic Studies Depression Scale revised version for adolescents<br><br>Self Esteem: Established single measure<br><br>Gender<br><br>BMI: Self-reported height and weight | SM use was significantly associated with BID, dietary restraint and muscle building behaviours in girls and boys (novel outcome for girls)<br><br>Self-esteem and depressive symptoms → SM ideal internalization & higher appearance comparison (support for moderator)<br><br>Higher BMI was directly associated with | Moderate                |

| # | Author | Country & World Bank Classification | Study Design | Participant characteristics | Objectives | Underlying theoretical framework | Social media platform | Exposure measure (Social media use) | Outcome measure (BI/ED symptomatology) | Mediator measure | Moderator measure | Results                                                                                                                                                                                                                                                                                                                                                                                                      | Quality appraisal grade |
|---|--------|-------------------------------------|--------------|-----------------------------|------------|----------------------------------|-----------------------|-------------------------------------|----------------------------------------|------------------|-------------------|--------------------------------------------------------------------------------------------------------------------------------------------------------------------------------------------------------------------------------------------------------------------------------------------------------------------------------------------------------------------------------------------------------------|-------------------------|
|   |        |                                     |              |                             |            |                                  |                       |                                     |                                        |                  |                   | <p>BID (moderator)<br/> SM ideal internalization &amp; higher appearance comparison → BID (support for mediators)<br/> Gender only moderated the relationship between SM &amp; muscular ideal internalization – only significant for boys<br/> Implies that vulnerabilities and high BMI predispose an individual to the detrimental effects of SM and BID (mediated through ideal internalization &amp;</p> |                         |

| #   | Author              | Country & World Bank Classification | Study Design | Participant characteristics                                                                          |                                                                                   | Objectives                                                                                                                                                                                       | Underlying theoretical framework                                                  | Social media platform | Exposure measure (Social media use)                   | Outcome measure (BI/ED symptomatology) | Mediator measure                                                                                                                               | Moderator measure | Results                                                                                                                                                                                                                                                                                                          | Quality appraisal grade |
|-----|---------------------|-------------------------------------|--------------|------------------------------------------------------------------------------------------------------|-----------------------------------------------------------------------------------|--------------------------------------------------------------------------------------------------------------------------------------------------------------------------------------------------|-----------------------------------------------------------------------------------|-----------------------|-------------------------------------------------------|----------------------------------------|------------------------------------------------------------------------------------------------------------------------------------------------|-------------------|------------------------------------------------------------------------------------------------------------------------------------------------------------------------------------------------------------------------------------------------------------------------------------------------------------------|-------------------------|
|     |                     |                                     |              |                                                                                                      |                                                                                   |                                                                                                                                                                                                  |                                                                                   |                       |                                                       |                                        |                                                                                                                                                |                   | appearance comparisons)                                                                                                                                                                                                                                                                                          |                         |
| 35. | Scully et al (2020) | Ireland<br><br>High-income economy  | CS           | N (% F)<br>Setting<br>Age<br>(mean +- SD)<br>BMI<br>Ethnicity<br>Sexual orientation<br>ED prevalence | 210 (100% F)<br>Secondary school<br>12-17 (15.16 +- 1.17)<br>NR<br>NR<br>NR<br>NR | Examined whether appearance related SM activity is associated with BID amongst adolescent girls<br>Explored whether social comparisons and thin-ideal internalization mediated this relationship | Sociocultural model<br><br>Social comparison theory<br><br>Objectification theory | FB                    | Appearance related SM exposure: 8-item photo subscale | BID: BID subscale of the ED inventory  | SM comparisons : Items devised by Fardouly and Vartanian (2015)<br><br>Internalisation of the thin ideal: The thin-ideal internalisation scale | N/A               | Demonstrated a significant positive relationship between appearance-based SM and body dissatisfaction via the mediating pathways of social comparison and internalization of the thin ideal<br>Time spent engaging in appearance related FB content was not directly associated with BID- only via the mediating | High                    |

| #   | Author                         | Country & World Bank Classification | Study Design | Participant characteristics                                                                              |                                                                                                                                                                           | Objectives                                                                             | Underlying theoretical framework                     | Social media platform | Exposure measure (Social media use)                                                                                                                | Outcome measure (BI/ED symptomatology)                       | Mediator measure                                                                                                                                                                                    | Moderator measure | Results                                                                                                                                                                                                                                                                                        | Quality appraisal grade |
|-----|--------------------------------|-------------------------------------|--------------|----------------------------------------------------------------------------------------------------------|---------------------------------------------------------------------------------------------------------------------------------------------------------------------------|----------------------------------------------------------------------------------------|------------------------------------------------------|-----------------------|----------------------------------------------------------------------------------------------------------------------------------------------------|--------------------------------------------------------------|-----------------------------------------------------------------------------------------------------------------------------------------------------------------------------------------------------|-------------------|------------------------------------------------------------------------------------------------------------------------------------------------------------------------------------------------------------------------------------------------------------------------------------------------|-------------------------|
|     |                                |                                     |              |                                                                                                          |                                                                                                                                                                           |                                                                                        |                                                      |                       |                                                                                                                                                    |                                                              |                                                                                                                                                                                                     |                   | pathways                                                                                                                                                                                                                                                                                       |                         |
| 36. | Tiggemann and Andenberg (2020) | US High-income economy              | Experimental | N (% F)<br>Setting<br>Age<br>(mean +- SD)<br>BMI<br>Ethnicity<br><br>Sexual orientation<br>ED prevalence | 300 (0% F)<br>Online<br>18-30 (24.94 +- 2.96)<br>26.01 (OW)<br>White 61.3%, African American 12.7%, Latino 11.7%, Asian 10.3%, Native American 2.0%, other 2%<br>NR<br>NR | Investigated the effects of exposure to idealised male fitspiration images on men's BI | Sociocultural theory<br><br>Social comparison theory | IG                    | SM usage: self-report questionnaire<br><br>Experimental exposure to bare-chested 'fitspiration' IG images, fashion images or control travel images | BI and facial satisfaction: validated visual analogue scales | Appearance comparison: The State Appearance Comparison Scale<br><br>Muscular Ideal Internalization: The Muscular Subscale of the Sociocultural Attitudes towards Appearance Questionnaire-4 revised | N/A               | Exposure to bare-chested fitspiration images → greater BID in contrast to fashion images and travel images<br><br>Social comparison and muscular ideal internalization were not significant mediators of this relationship, demonstrating that other mechanisms may be at play for adult males | High                    |
| 37. | Verrastro et al (2020)         | Italy High-                         | CS           | N (% F)<br>Setting<br>Age                                                                                | 621 (61% F)<br>Secondary school                                                                                                                                           | Investigated the relationship between IG use                                           | Impression management theory                         | IG                    | IG usage: self-reported questionnaire                                                                                                              | BI & anxiety: Sociocultural                                  | Photo investment: editing                                                                                                                                                                           | N/A               | Adolescent girls and boys who edit photos and                                                                                                                                                                                                                                                  | High                    |

| # | Author | Country & World Bank Classification | Study Design | Participant characteristics |                       | Objectives                                                                                           | Underlying theoretical framework | Social media platform | Exposure measure (Social media use) | Outcome measure (BI/ED symptomatology)                                                                                                                 | Mediator measure          | Moderator measure | Results                                                                                                                                                                                                                                                                                                                                                                                                         | Quality appraisal grade |
|---|--------|-------------------------------------|--------------|-----------------------------|-----------------------|------------------------------------------------------------------------------------------------------|----------------------------------|-----------------------|-------------------------------------|--------------------------------------------------------------------------------------------------------------------------------------------------------|---------------------------|-------------------|-----------------------------------------------------------------------------------------------------------------------------------------------------------------------------------------------------------------------------------------------------------------------------------------------------------------------------------------------------------------------------------------------------------------|-------------------------|
|   |        | income economy                      |              | (mean +- SD)                | 13-21 (15.90 +- 1.55) | and photo editing, internalization of 'beauty' standards, pressure to adhere to these & BI anxieties | Objectification theory           |                       |                                     | aptitudes toward appearance questionnaire<br><br>Fear of negative appearance evaluation scale<br><br>Physical appearance state and trait anxiety scale | photos and posting online |                   | post these online have greater internalized stereotypes of beauty, feel greater pressure to adhere to this, experience higher BI related anxiety and report higher fear of negative evaluation from others<br><br>Females had higher levels of BI related anxiety and internalized the beauty ideal more than male counterparts (gender as a slight moderator)<br><br>Fear of negative evaluation from others & |                         |

| #   | Author               | Country & World Bank Classification | Study Design                                      | Participant characteristics                                                                                    |                                                                                                                                                                                                                                                      | Objectives                                                                                                                                  | Underlying theoretical framework                           | Social media platform | Exposure measure (Social media use)                                                                                                                                                                                                  | Outcome measure (BI/ED symptomatology)                                                                                     | Mediator measure                                                                                                                                          | Moderator measure       | Results                                                                                                                                                                                                                                                                                           | Quality appraisal grade |
|-----|----------------------|-------------------------------------|---------------------------------------------------|----------------------------------------------------------------------------------------------------------------|------------------------------------------------------------------------------------------------------------------------------------------------------------------------------------------------------------------------------------------------------|---------------------------------------------------------------------------------------------------------------------------------------------|------------------------------------------------------------|-----------------------|--------------------------------------------------------------------------------------------------------------------------------------------------------------------------------------------------------------------------------------|----------------------------------------------------------------------------------------------------------------------------|-----------------------------------------------------------------------------------------------------------------------------------------------------------|-------------------------|---------------------------------------------------------------------------------------------------------------------------------------------------------------------------------------------------------------------------------------------------------------------------------------------------|-------------------------|
|     |                      |                                     |                                                   |                                                                                                                |                                                                                                                                                                                                                                                      |                                                                                                                                             |                                                            |                       |                                                                                                                                                                                                                                      |                                                                                                                            |                                                                                                                                                           |                         | pressure to uphold the IG ideal was equal for both genders                                                                                                                                                                                                                                        |                         |
| 38. | Wick and Keel (2020) | US High-income economy              | Mixed methods: CS & experimental (2 stage design) | Stage 1: N (% F)<br>Setting<br>Age (mean +- SD)<br>BMI<br>Ethnicity<br><br>Sexual orientation<br>ED prevalence | Cross sectional<br>2,485 (76% F)<br>University<br>(19.01 +- 1.80)<br>NR<br>77% White, 10% Black, 4% Asian, 2% Other, 23% Hispanic<br>NR<br>NR<br><br>Experimental<br>89 (93% F)<br>University<br>(18.71 +- 0.97)<br>22.64<br>91% White, 8% Black, 6% | Investigated the association between posting edited photos on IG and DE, anxiety & depressive symptoms amongst university males and females | Impression management theory<br><br>Gratification's theory | IG                    | Stage 1. self-reported questionnaire on SM usage<br><br>Stage 2. Participants took a full body photo and randomised to one of four conditions: 1) edit and post photo on IG 2) edit but not post 3) post unedited version 4) control | DE: EAT-26 scale<br><br>Anxiety: Penn State Worry questionnaire<br><br>Depressive symptoms: Patient Health Questionnaire-9 | Modifying photos: self-reported and as part of experiment<br><br>Problematic IG use: self-reported comparison, addiction, and investment in peer feedback | Gender<br><br>Ethnicity | Stage 1: CS Direct link between posting edited photos and ED risk factors and anxiety but no relationship with depressive symptoms<br>Posting photos was more common for females and for White and Asian participants<br><br>Stage 2: Experimental Participants assigned to the posting an edited | Moderate                |



| #   | Author               | Country & World Bank Classification  | Study Design | Participant characteristics                                                 |                                                                        | Objectives                                                                                     | Underlying theoretical framework | Social media platform        | Exposure measure (Social media use) | Outcome measure (BI/ED symptomatology)                            | Mediator measure                                 | Moderator measure | Results                                                                                                                                                                                                                                                                                | Quality appraisal grade |
|-----|----------------------|--------------------------------------|--------------|-----------------------------------------------------------------------------|------------------------------------------------------------------------|------------------------------------------------------------------------------------------------|----------------------------------|------------------------------|-------------------------------------|-------------------------------------------------------------------|--------------------------------------------------|-------------------|----------------------------------------------------------------------------------------------------------------------------------------------------------------------------------------------------------------------------------------------------------------------------------------|-------------------------|
|     |                      |                                      |              | (mean +- SD)<br>BMI<br>Ethnicity<br><br>Sexual orientation<br>ED prevalence | Asian, 1%<br>other, 24%<br>Hispanic<br>NR<br>NR                        |                                                                                                |                                  |                              |                                     |                                                                   |                                                  |                   | photo of themselves<br>condition had significant increases in weight/shape concerns with a large effect size. This heightened anxiety and increased urges to exercise and restrict food intake<br>Just 5 minutes of editing a photo led to sadness and increased weight/shape concerns |                         |
| 39. | Wilksch et al (2020) | Australia<br><br>High-income economy | CS           | N (% F)<br>Setting<br>Age (mean +- SD)<br>BMI<br>Ethnicity                  | 996 (53.6% F)<br>Secondary school<br>NR (13.08 +- 0.60)<br>18.94<br>NR | Investigated the relationship between SM usage and rates of DE eating in young adolescent boys | Sociocultural theory             | Multiple: FB, IG, SC, Tumblr | SM use: self-report questionnaire   | DE cognitions: EDE-Q<br><br>DE behaviours: Project EAT assessment | Time spent on SM and number of platforms visited | Gender            | DE cognitions and behaviours and SM usage were significantly associated, with greater effect sizes for IG, SC                                                                                                                                                                          | Low                     |

| #   | Author            | Country & World Bank Classification | Study Design | Participant characteristics            |                                                           | Objectives                                          | Underlying theoretical framework | Social media platform       | Exposure measure (Social media use)       | Outcome measure (BI/ED symptomatology)           | Mediator measure                        | Moderator measure | Results                                                                                                                                                                                                                                                                                                                              | Quality appraisal grade |
|-----|-------------------|-------------------------------------|--------------|----------------------------------------|-----------------------------------------------------------|-----------------------------------------------------|----------------------------------|-----------------------------|-------------------------------------------|--------------------------------------------------|-----------------------------------------|-------------------|--------------------------------------------------------------------------------------------------------------------------------------------------------------------------------------------------------------------------------------------------------------------------------------------------------------------------------------|-------------------------|
|     |                   |                                     |              | Sexual orientation<br>ED prevalence    | NR but DE behaviours reported by 51.7% girls and 45% boys | and girls                                           |                                  |                             |                                           |                                                  |                                         |                   | & FB (image-oriented platforms). DE behaviours included strict exercise and meal skipping and were reported by 51.7% girls and 45% boys<br>Time spent on SM & number of SM sites visited were significant mediators of this relationship<br>Girls posted more photos of people and food and displayed higher levels of DE behaviours |                         |
| 40. | Yang et al (2020) | Singapore<br><br>High-income        | CS           | N (% F)<br>Setting<br>Age<br>(mean +-) | 100 (100% F)<br>Community<br>13-18 (15.07 +- 1.33)        | Investigated the relationship between SM use and BI | Cognitive affective model        | MultipleFB, IG, SC, Twitter | SM use: modified version of the media and | BI: Body esteem scale for adolescents and adults | Internalisation of the ideal: Cognitive | N/A               | Excessive SM use (+3 hour daily) negatively impacts BE in                                                                                                                                                                                                                                                                            | High                    |

| #   | Author           | Country & World Bank Classification | Study Design | Participant characteristics                                        |                                                                         | Objectives                                                                                                                   | Underlying theoretical framework | Social media platform | Exposure measure (Social media use) | Outcome measure (BI/ED symptomatology)                                                                           | Mediator measure                                                                                                                                                                                                                               | Moderator measure           | Results                                                                                                                                                                                                                                                                                       | Quality appraisal grade |
|-----|------------------|-------------------------------------|--------------|--------------------------------------------------------------------|-------------------------------------------------------------------------|------------------------------------------------------------------------------------------------------------------------------|----------------------------------|-----------------------|-------------------------------------|------------------------------------------------------------------------------------------------------------------|------------------------------------------------------------------------------------------------------------------------------------------------------------------------------------------------------------------------------------------------|-----------------------------|-----------------------------------------------------------------------------------------------------------------------------------------------------------------------------------------------------------------------------------------------------------------------------------------------|-------------------------|
|     |                  | economy                             |              | SD)<br>BMI<br>Ethnicity<br><br>Sexual orientation<br>ED prevalence | NR<br>60% Chinese,<br>18% Malay,<br>9% Indian.<br>13% Other<br>NR<br>NR | Explored whether internalization of the idea, appearance comparison and social appearance anxiety mediated this relationship |                                  |                       | technology usage attitudes scale    | Weight locus of control: 16-item dieting beliefs scale to assess participants control beliefs about their weight | internalization subscale from the Sociocultural Attitudes Towards Appearance Scale<br><br>Appearance comparisons : 10-item adapted version of the Physical Appearance Scale<br><br>Appearance anxiety: 16-item Social Appearance Anxiety Scale |                             | female adolescents<br>This relationship was significantly mediated by internalisation of the thin/fit ideal & upward appearance comparisons<br>Found that both online and real-life comparisons mediated the relationship between excessive SM use and BE<br>Directionality cannot be assumed |                         |
| 41. | Yao et al (2020) | China<br><br>Upper-                 | CS           | N (% F)<br>Setting<br>Age                                          | 567 (100% F)<br>University<br>17-23 (19.97)                             | Investigated the relationship between BI                                                                                     | Objectification theory           | General               | SM usage: self-report questionnaire | Restrained eating: Restrained                                                                                    | Body shame: Body shame                                                                                                                                                                                                                         | Body appreciation: The Body | BI comparisons and body shame mediated the                                                                                                                                                                                                                                                    | High                    |

| # | Author | Country & World Bank Classification | Study Design | Participant characteristics |                   | Objectives                                                                                                                                                        | Underlying theoretical framework | Social media platform | Exposure measure (Social media use) | Outcome measure (BI/ED symptomatology)                             | Mediator measure                                                            | Moderator measure           | Results                                                                                                                                                                                                                                                                                                                                                                    | Quality appraisal grade |
|---|--------|-------------------------------------|--------------|-----------------------------|-------------------|-------------------------------------------------------------------------------------------------------------------------------------------------------------------|----------------------------------|-----------------------|-------------------------------------|--------------------------------------------------------------------|-----------------------------------------------------------------------------|-----------------------------|----------------------------------------------------------------------------------------------------------------------------------------------------------------------------------------------------------------------------------------------------------------------------------------------------------------------------------------------------------------------------|-------------------------|
|   |        | middle-income economy               |              | (mean +- SD)                | + - 1.37<br>19.83 | comparisons on SM, body shame and restrained eating amongst Chinese university students<br>Explored whether body appreciation and BMI moderated this relationship | Social comparison theory         |                       |                                     | eating subscale of the Dutch Eating Behaviour Questionnaire (DEBQ) | subscale of the Chinese version of the Objectified Body Consciousness Scale | Appreciation Scale-2<br>BMI | relationship between SM usage and restrained eating<br>SM usage → BI comparisons → Body shame → Restrained eating<br>Body appreciation* buffered the relationship between BS and restrained eating<br>The relationship between BS and RE was stronger amongst women with lower BMI but BI comparisons and RE was stronger for women with a higher BMI (BMI as a moderator) |                         |

| #   | Author                   | Country & World Bank Classification          | Study Design | Participant characteristics                                                                          |                                                                                         | Objectives                                                                          | Underlying theoretical framework                     | Social media platform | Exposure measure (Social media use)                                                                                                                 | Outcome measure (BI/ED symptomatology)       | Mediator measure                                                     | Moderator measure                                        | Results                                                                                                                                                                                                                                               | Quality appraisal grade |
|-----|--------------------------|----------------------------------------------|--------------|------------------------------------------------------------------------------------------------------|-----------------------------------------------------------------------------------------|-------------------------------------------------------------------------------------|------------------------------------------------------|-----------------------|-----------------------------------------------------------------------------------------------------------------------------------------------------|----------------------------------------------|----------------------------------------------------------------------|----------------------------------------------------------|-------------------------------------------------------------------------------------------------------------------------------------------------------------------------------------------------------------------------------------------------------|-------------------------|
| 42. | Baminiwatta et al (2021) | Sri Lanka<br><br>Lower-middle income economy | CS           | N (% F)<br>Setting<br>Age<br>(mean +- SD)<br>BMI<br>Ethnicity<br>Sexual orientation<br>ED prevalence | 478 (46.3%)<br>Secondary school<br>13-19 (NR)<br>NR<br>NR<br>NR<br>NR                   | Investigated the relationship between SM behaviours & BID amongst adolescents       | Impression management theory                         | General               | SM usage: time spent on SM and frequency of selfie posting, selfie-taking & photo manipulation using ordinal scale developed by McLean et al (2015) | BID: Self-administered BI satisfaction scale | SM activities: selfie-taking, selfie-posting, and photo manipulation | Gender<br><br>BMI                                        | Taking 'selfies' was associated with BID for the whole sample whilst photo manipulation was significantly associated with BID amongst girls only<br>SM activities were comparable to young women in Australia<br>BMI was directly associated with BID | Low                     |
| 43. | Dignard and Jarry (2021) | Canada<br><br>High-income economy            | Experimental | N (% F)<br>Setting<br>Age<br>(mean +- SD)<br>BMI<br>Ethnicity                                        | 340 (100%)<br>University<br>17-43 (20.61 +- 2.64)<br>23.35kg<br>77.7% White, 9.3% Arab, | Experimentally compared the effects of fitspiration and thinspiration on women's BI | Sociocultural theory<br><br>Social comparison theory | IG                    | Experimental exposure to either thinspiration, fitspiration or control travel images on IG                                                          | BI: 10-item Body Appreciation Scale          | State appearance comparison: Items validated by Tiggemann and McGill | State body satisfaction: 10-item Body Appreciation scale | Viewing fitspiration and thinspiration was equally associated with BID relative to viewing control                                                                                                                                                    | Moderate                |

| # | Author | Country & World Bank Classification | Study Design | Participant characteristics         |                                                             | Objectives | Underlying theoretical framework | Social media platform | Exposure measure (Social media use)                         | Outcome measure (BI/ED symptomatology) | Mediator measure | Moderator measure | Results                                                                                                                                                                                                                                                                                                                                                        | Quality appraisal grade |
|---|--------|-------------------------------------|--------------|-------------------------------------|-------------------------------------------------------------|------------|----------------------------------|-----------------------|-------------------------------------------------------------|----------------------------------------|------------------|-------------------|----------------------------------------------------------------------------------------------------------------------------------------------------------------------------------------------------------------------------------------------------------------------------------------------------------------------------------------------------------------|-------------------------|
|   |        |                                     |              | Sexual orientation<br>ED prevalence | 6.6% African, 5.2% South Asian, 2.7% East Asian<br>NR<br>NR |            |                                  |                       | SM usage: SM platforms used, frequency, specific activities |                                        | (2004)           | Ethnicity         | travel images<br>This was mediated by engagement appearance comparisons, which was higher for the Fitspiration group<br>Higher state positive BI only inhibited appearance comparison with thinspiration and not fitspiration – protective against emaciated thinspiration images but NOT fitspiration<br>Non-white – only fitspiration → body dissatisfaction |                         |

| #   | Author              | Country & World Bank Classification  | Study Design | Participant characteristics                                                                          |                                                                    | Objectives                                                                                                                               | Underlying theoretical framework                   | Social media platform | Exposure measure (Social media use)                                                            | Outcome measure (BI/ED symptomatology)                                                             | Mediator measure                                                        | Moderator measure                                                                                                | Results                                                                                                                                                                                                                                                                             | Quality appraisal grade |
|-----|---------------------|--------------------------------------|--------------|------------------------------------------------------------------------------------------------------|--------------------------------------------------------------------|------------------------------------------------------------------------------------------------------------------------------------------|----------------------------------------------------|-----------------------|------------------------------------------------------------------------------------------------|----------------------------------------------------------------------------------------------------|-------------------------------------------------------------------------|------------------------------------------------------------------------------------------------------------------|-------------------------------------------------------------------------------------------------------------------------------------------------------------------------------------------------------------------------------------------------------------------------------------|-------------------------|
|     |                     |                                      |              |                                                                                                      |                                                                    |                                                                                                                                          |                                                    |                       |                                                                                                |                                                                                                    |                                                                         |                                                                                                                  | but this was NOT mediated by appearance comparison                                                                                                                                                                                                                                  |                         |
| 44. | Ding and Xu (2021)  | China<br>Upper-middle-income economy | CS           | N (% F)<br>Setting<br>Age<br>(mean +- SD)<br>BMI<br>Ethnicity<br>Sexual orientation<br>ED prevalence | 551 (51.3%)<br>Secondary school<br>15-17 (16.11)<br>NR<br>NR<br>NR | Investigated the relationship between appearance-based comparisons on SM, anxiety and emotional eating<br>Explored anxiety as a mediator | Sociocultural theory<br><br>Social identity theory | Chinese micro-blogs   | SM usage: appearance-based SM comparisons using revised scale by Fardouly and Vartanian (2015) | Emotional eating: Emotional Eating Scale (EES-C scale) adapted for use in children and adolescents | Anxiety: anxiety subscale of the Depression Anxiety Stress Scale (DASS) | Sociocultural pressure: subscale from the Sociocultural Attitudes towards appearance questionnaire<br><br>Gender | Social comparisons on SM → emotional eating which was fully mediated by anxiety amongst both genders<br>Females were slightly more sensitive to appearance comparisons on SM and showed more emotional eating tendencies in contrast to male counterparts (gender partly moderated) | Moderate                |
| 45. | Jarman et al (2021) | Australia                            | CS           | N (% F)<br>Setting                                                                                   | 1,579 (55.6% F)                                                    | Investigated whether                                                                                                                     | Tripartite influence                               | General               | SM usage: intensity and                                                                        | BI: Modified version of the                                                                        | Thin and muscular                                                       | Gender                                                                                                           | Only higher appearance                                                                                                                                                                                                                                                              | Moderate                |

| # | Author | Country & World Bank Classification | Study Design | Participant characteristics                                                 |                                                                                         | Objectives                                                                                                                                                                              | Underlying theoretical framework | Social media platform | Exposure measure (Social media use) | Outcome measure (BI/ED symptomatology)                                                                                                                                                                                                                                               | Mediator measure                                                                                                                                                        | Moderator measure | Results                                                                                                                                                                                                                                                                                                                                                                     | Quality appraisal grade |
|---|--------|-------------------------------------|--------------|-----------------------------------------------------------------------------|-----------------------------------------------------------------------------------------|-----------------------------------------------------------------------------------------------------------------------------------------------------------------------------------------|----------------------------------|-----------------------|-------------------------------------|--------------------------------------------------------------------------------------------------------------------------------------------------------------------------------------------------------------------------------------------------------------------------------------|-------------------------------------------------------------------------------------------------------------------------------------------------------------------------|-------------------|-----------------------------------------------------------------------------------------------------------------------------------------------------------------------------------------------------------------------------------------------------------------------------------------------------------------------------------------------------------------------------|-------------------------|
|   |        | High-income economy                 |              | Age (mean +- SD)<br>BMI<br>Ethnicity<br>Sexual orientation<br>ED prevalence | Secondary school 11-17 (13.45 +- 1.15)<br>NR<br>85.55% White, Asian (8.27%)<br>NR<br>NR | appearance ideal (thin & muscular) internalization and social appearance comparisons mediated relationships between SM engagement (intensity & appearance focused) and BI and wellbeing | model                            |                       | appearance focused SM use           | Body Shape Satisfaction scale<br><br>Two items from the Weight and Shape subscales of the Eating Disorder Examination Questionnaire (EDE-Q) to measure overvaluation of weight and shape<br><br>The Appearance Esteem subscale of the Body Esteem scale<br><br>Wellbeing: the 5-item | ideal internalization:<br>The Thin/Low Body Fat subscale of the Sociocultural Attitudes Towards Appearance Questionnaire-4 (SATAQ-4R-Male)<br><br>Social and appearance |                   | focused SM use was directly associated with BID and lower wellbeing<br>Higher appearance ideal internalization and appearance comparisons mediated the relationship between higher SM engagement and BID and lower wellbeing, which was strongest for comparisons SM intensity did not directly → BID and low wellbeing (only via the mediating pathways)<br>Gender was not |                         |



| #   | Author              | Country & World Bank Classification | Study Design | Participant characteristics                                                                       |                                                                                                | Objectives                                                                                                                                                                    | Underlying theoretical framework                                                   | Social media platform | Exposure measure (Social media use)                                                              | Outcome measure (BI/ED symptomatology)                                                                                                                                                           | Mediator measure                                                                                        | Moderator measure | Results                                                                                                                                                                                                                    | Quality appraisal grade |
|-----|---------------------|-------------------------------------|--------------|---------------------------------------------------------------------------------------------------|------------------------------------------------------------------------------------------------|-------------------------------------------------------------------------------------------------------------------------------------------------------------------------------|------------------------------------------------------------------------------------|-----------------------|--------------------------------------------------------------------------------------------------|--------------------------------------------------------------------------------------------------------------------------------------------------------------------------------------------------|---------------------------------------------------------------------------------------------------------|-------------------|----------------------------------------------------------------------------------------------------------------------------------------------------------------------------------------------------------------------------|-------------------------|
|     |                     |                                     |              |                                                                                                   |                                                                                                |                                                                                                                                                                               |                                                                                    |                       |                                                                                                  | satisfaction with life scale                                                                                                                                                                     | comparison: Frequency of comparisons on SM 5 items from the Upward Physical Appearance Comparison Scale |                   | a moderator although boys were more likely to internalise the muscular ideal                                                                                                                                               |                         |
| 46. | Jiotsa et al (2021) | France<br>High-income economy       | CS           | N (% F)<br>Setting<br>Age (mean +- SD)<br>BMI<br>Ethnicity<br>Sexual orientation<br>ED prevalence | 1331 (97.7% F)<br>Community<br>15-35 (24.4 +- 4.2)<br>22.3<br>NR<br>NR<br>193 patients (14.5%) | Investigated the association between how often one compared their physical appearance to that of people followed on SM and one's BID and drive for thinness and ED prevalence | Sociocultural theory<br><br>Social comparison theory<br><br>Gratification's theory | Multiple              | SM usage: platform, frequency, time spent, frequency of comparisons, frequency of selfie posting | BI: Eating disorder Inventory (EDI-2) scale translated and adapted into French – includes Drive for Thinness and Body Dissatisfaction subscales<br><br>ED screening: Sick-Control-One-Stone-Fat- | N/A                                                                                                     | BMI               | ED or at-risk ED subjects (based on SCOFF score) demonstrated higher rates of BID and greater drive for thinness<br>Significant association between frequency of comparing one's own physical appearance to that of people | Moderate                |

| #   | Author               | Country & World Bank Classification | Study Design                       | Participant characteristics                     |                                                        | Objectives                                                                  | Underlying theoretical framework | Social media platform | Exposure measure (Social media use)         | Outcome measure (BI/ED symptomatology)                      | Mediator measure                                                      | Moderator measure | Results                                                                                                                                                                                                                                                                        | Quality appraisal grade |
|-----|----------------------|-------------------------------------|------------------------------------|-------------------------------------------------|--------------------------------------------------------|-----------------------------------------------------------------------------|----------------------------------|-----------------------|---------------------------------------------|-------------------------------------------------------------|-----------------------------------------------------------------------|-------------------|--------------------------------------------------------------------------------------------------------------------------------------------------------------------------------------------------------------------------------------------------------------------------------|-------------------------|
|     |                      |                                     |                                    |                                                 |                                                        |                                                                             |                                  |                       |                                             | Food (SCOFF) questionnaires                                 |                                                                       |                   | <p>followed on SM and BD and drive for thinness</p> <p>Plausible that this is bidirectional i.e., appearance comparisons on SM → BID and drive for thinness OR that state BID and drive for thinness → greater appearance comparisons on SM</p> <p>BMI was not a moderator</p> |                         |
| 47. | Limniou et al (2021) | UK<br><br>High-income economy       | Mixed methods: experimental and CS | N (% F)<br>Setting<br>Age<br>(mean +-SD)<br>BMI | 109 (86.20% F)<br>University<br>18-50 (20 +-3.3)<br>NR | Investigated the effects of viewing fitspiration photos on BI and fit-ideal | Tripartite influence model       | IG                    | Experimental exposure to fitspiration on IG | BI: 5-item body satisfaction scale<br><br>Mood: 5-item mood | Fit ideal internalisation: 11-item<br>Fit Ideal Internalization Scale | Gender<br><br>Age | Exposure to fitspiration produced a significant reduction in state self-esteem,                                                                                                                                                                                                | Low                     |

| # | Author | Country & World Bank Classification | Study Design | Participant characteristics                      |                | Objectives                                                                          | Underlying theoretical framework | Social media platform | Exposure measure (Social media use) | Outcome measure (BI/ED symptomatology)                 | Mediator measure | Moderator measure | Results                                                                                                                                                                                                                                                                                                                                                   | Quality appraisal grade |
|---|--------|-------------------------------------|--------------|--------------------------------------------------|----------------|-------------------------------------------------------------------------------------|----------------------------------|-----------------------|-------------------------------------|--------------------------------------------------------|------------------|-------------------|-----------------------------------------------------------------------------------------------------------------------------------------------------------------------------------------------------------------------------------------------------------------------------------------------------------------------------------------------------------|-------------------------|
|   |        |                                     |              | Ethnicity<br>Sexual orientation<br>ED prevalence | NR<br>NR<br>NR | internalisation (measuring SE, BS, mood satisfaction and fit-ideal internalisation) |                                  |                       |                                     | satisfaction scale<br><br>SE: 5-item self-esteem scale |                  |                   | mood satisfaction and fit-ideal internalisation and had no significant impact on body satisfaction<br>Fit-ideal internalisation decreased after viewing fitspiration images (other mechanisms must be at play)<br>Age was not a moderator<br>Gender was a moderator: males internalized the fit ideal more but women demonstrated lower mood satisfaction |                         |

| #   | Author                 | Country & World Bank Classification | Study Design             | Participant characteristics                                                                       |                                                                                   | Objectives                                                                       | Underlying theoretical framework                     | Social media platform | Exposure measure (Social media use)         | Outcome measure (BI/ED symptomatology) | Mediator measure                                 | Moderator measure                                     | Results                                                                                                                                                                                 | Quality appraisal grade |
|-----|------------------------|-------------------------------------|--------------------------|---------------------------------------------------------------------------------------------------|-----------------------------------------------------------------------------------|----------------------------------------------------------------------------------|------------------------------------------------------|-----------------------|---------------------------------------------|----------------------------------------|--------------------------------------------------|-------------------------------------------------------|-----------------------------------------------------------------------------------------------------------------------------------------------------------------------------------------|-------------------------|
|     |                        |                                     |                          |                                                                                                   |                                                                                   |                                                                                  |                                                      |                       |                                             |                                        |                                                  |                                                       | Specific IG activities e.g. investment in likes, was negatively associated with self-esteem, mood and BS<br>Higher IG frequency use and posting was related to higher state self-esteem |                         |
| 48. | Mahon and Hevey (2021) | Ireland<br><br>High-income economy  | Qualitative focus groups | N (% F)<br>Setting<br>Age (mean +- SD)<br>BMI<br>Ethnicity<br>Sexual orientation<br>ED prevalence | 29 (79.3% F)<br>Secondary school<br>15-16 (15.31 +- 0.47)<br>NR<br>NR<br>NR<br>NR | Explored adolescent's experiences of SM on BI and any coping mechanisms employed | Tripartite model<br><br>Impression management theory | General               | General SM use explored during focus groups | BI                                     | Comparison with peers<br><br>Investment in likes | Gender<br><br>SM literacy<br><br>Protective filtering | Demonstrated that despite considerable awareness to filter out damaging BI content, its presence on SM sites is ubiquitous. Students reported comparing to others, trying to            | High                    |

| # | Author | Country & World Bank Classification | Study Design | Participant characteristics | Objectives | Underlying theoretical framework | Social media platform | Exposure measure (Social media use) | Outcome measure (BI/ED symptomatology) | Mediator measure | Moderator measure | Results                                                                                                                                                                                                                                                                                                                                                                                                      | Quality appraisal grade |
|---|--------|-------------------------------------|--------------|-----------------------------|------------|----------------------------------|-----------------------|-------------------------------------|----------------------------------------|------------------|-------------------|--------------------------------------------------------------------------------------------------------------------------------------------------------------------------------------------------------------------------------------------------------------------------------------------------------------------------------------------------------------------------------------------------------------|-------------------------|
|   |        |                                     |              |                             |            |                                  |                       |                                     |                                        |                  |                   | <p>look like everyone else, 'hating' photos of themselves, picking out flaws and self-blame for failing to adhere to the ideal.</p> <p>Discussed exposure to advertising for weight loss on SM platforms</p> <p>Participants were critical of BP movements and claimed that skinnier people/those closer to the ideal receive more rewards (comments and likes)</p> <p>Girls were more aware of editing,</p> |                         |

| #   | Author             | Country & World Bank Classification | Study Design | Participant characteristics                                             |                                                                          | Objectives                                                                      | Underlying theoretical framework | Social media platform | Exposure measure (Social media use)                                                          | Outcome measure (BI/ED symptomatology)                                                | Mediator measure | Moderator measure | Results                                                                                                                                                                                                                          | Quality appraisal grade |
|-----|--------------------|-------------------------------------|--------------|-------------------------------------------------------------------------|--------------------------------------------------------------------------|---------------------------------------------------------------------------------|----------------------------------|-----------------------|----------------------------------------------------------------------------------------------|---------------------------------------------------------------------------------------|------------------|-------------------|----------------------------------------------------------------------------------------------------------------------------------------------------------------------------------------------------------------------------------|-------------------------|
|     |                    |                                     |              |                                                                         |                                                                          |                                                                                 |                                  |                       |                                                                                              |                                                                                       |                  |                   | placed huge emphasis on likes, and felt very strongly about comparisons vs boys who showed greater body esteem, saw the muscular ideal as motivating (functionality), and were less aware of editing/manipulation of male bodies |                         |
| 49. | Stein et al (2021) | Germany<br>High-income economy      | CS           | N (% F)<br>Setting<br>Age<br>(mean +- SD)<br>BMI<br>Ethnicity<br>Sexual | 228 (75% F)<br>Online<br>18-34 years<br>(22.5 +- 3.04)<br>NR<br>NR<br>NR | Investigated SM use (IG) as a potential cultivation system for young adult's BI | Cultivation theory               | IG                    | SM usage: self-reported weekly time spent on IG and activities i.e., browsing public content | BI: Body Esteem Scale for Adolescents and Adults<br><br>Dietary restraint: The EAT-26 | IG activities    | Gender            | Time on IG did not significantly predict any outcomes of interest<br><br>Strong tendency to browse IG predicted stricter                                                                                                         | High                    |

| # | Author | Country & World Bank Classification | Study Design | Participant characteristics | Objectives | Underlying theoretical framework | Social media platform | Exposure measure (Social media use) | Outcome measure (BI/ED symptomatology) | Mediator measure | Moderator measure | Results                                                                                                                                                                                                                                                                                                                                                    | Quality appraisal grade |
|---|--------|-------------------------------------|--------------|-----------------------------|------------|----------------------------------|-----------------------|-------------------------------------|----------------------------------------|------------------|-------------------|------------------------------------------------------------------------------------------------------------------------------------------------------------------------------------------------------------------------------------------------------------------------------------------------------------------------------------------------------------|-------------------------|
|   |        |                                     |              | orientation ED prevalence   |            |                                  |                       |                                     |                                        |                  |                   | views on the weight of strangers (particularly for women) and increased risk for DE for both males and females<br>Females were more likely to overestimate frequency of BS in the general population and hold unfavourable views of their own body<br>IG is a meaningful cultivation system for body-related attitudes and behaviours amongst young adults |                         |

| #   | Author                  | Country & World Bank Classification | Study Design | Participant characteristics                                                                          |                                                                              | Objectives                                                                                                            | Underlying theoretical framework | Social media platform                         | Exposure measure (Social media use)                                                                                       | Outcome measure (BI/ED symptomatology)                                                                       | Mediator measure | Moderator measure | Results                                                                                                                                                                                                                                                                                           | Quality appraisal grade |
|-----|-------------------------|-------------------------------------|--------------|------------------------------------------------------------------------------------------------------|------------------------------------------------------------------------------|-----------------------------------------------------------------------------------------------------------------------|----------------------------------|-----------------------------------------------|---------------------------------------------------------------------------------------------------------------------------|--------------------------------------------------------------------------------------------------------------|------------------|-------------------|---------------------------------------------------------------------------------------------------------------------------------------------------------------------------------------------------------------------------------------------------------------------------------------------------|-------------------------|
| 50. | Vall-Roque et al (2021) | Spain<br><br>High-income economy    | CS           | N (% F)<br>Setting<br>Age<br>(mean +- SD)<br>BMI<br>Ethnicity<br>Sexual orientation<br>ED prevalence | 2601 (100% F)<br>Community<br>14-35 (24.05)<br>23.79kg (H)<br>NR<br>NR<br>NR | Aimed to determine the impact of COVID-19 lockdown on SNS and its association with body image disturbances and low SE | Sociocultural theory             | Multiple: IG, YouTube, TikTok, Twitter and FB | SM usage: self-report SM items assessing frequency of SM use pre and during lockdown and types of accounts followed on IG | BI: Drive for thinness and BID subscales of the ED inventory<br><br>Self-esteem: Rosenberg self-esteem scale | N/A              | N/A               | Statistically significant association between frequency of all studied SNSs during lockdown, following appearance focused accounts & subsequent drive for thinness, low self-esteem and BID amongst generation z participants (14-24)<br><br>This did not lead to BID for the older age group >24 | Moderate                |

NR = not reported

N/A = not applicable
