# Supplementary material for: The social media diet: A scoping review to investigate the association between social media, body image and eating disorders amongst young people
Source: PubMed Central journal article supplement (PMC10032524; doi:10.1371/journal.pgph.0001091), 2023-03-22
Supplement: pgph.0001091.s003.pdf [file pgph.0001091.s003.pdf]

## S3 Table. Additional theories outside of Rodgers' framework

| THEORY                            | EXPLANATION                                                                                                                                                                                                                                                                   |
|-----------------------------------|-------------------------------------------------------------------------------------------------------------------------------------------------------------------------------------------------------------------------------------------------------------------------------|
| <i>Social learning theory</i>     | Individuals observe and imitate the behaviours of others, particularly when that behaviour is rewarded. This is hypothesized to play a role in the development of body image (BI) attitudes and disordered eating (DE) behaviours e.g., dieting                               |
| <i>Social comparison theory</i>   | Self-evaluation is derived from comparisons to similar others. Comparisons can be upward (comparing to someone deemed superior) or downward (comparing to someone deemed inferior)                                                                                            |
| <i>Cultivation theory</i>         | Immersion in social media shapes attitudes, perceptions and behaviours based on what is perceived as the norm                                                                                                                                                                 |
| <i>Cognitive affective model</i>  | Hypothesises that the internalisation of the thin ideal leads to social comparison and subsequent poor body esteem outcomes                                                                                                                                                   |
| <i>Tripartite influence model</i> | Postulates that the media (social or mass), parents and peers contribute to the development of appearance ideals, social comparison and subsequent BI or DE outcomes                                                                                                          |
| <i>Biopsychosocial model</i>      | Brings together both biological and sociocultural theories of BI and eating disorders (ED). Indicates that self-esteem, depressive state, and SM use → internalisation of the thin/muscular ideal & upward appearance comparison → body image dissatisfaction (BID) & dietary |

restraint & muscle building behaviours

*Dual pathway model*

Postulates that social environmental pressures to be thin (media, family, and peers) leads to thin-ideal internalisation. Where an individual is unable to actualise this ideal, this leads to BID. BID is hypothesised to lead to bulimia symptomatology via two pathways: dietary restraint (& subsequent bingeing /purging) and negative emotionality (& subsequent bingeing / purging as a distraction)
