# Supplementary material for: The social media diet: A scoping review to investigate the association between social media, body image and eating disorders amongst young people
Source: PubMed Central journal article supplement (PMC10032524; doi:10.1371/journal.pgph.0001091), 2023-03-22
Supplement: pgph.0001091.s004.pdf [file pgph.0001091.s004.pdf]

## S4 Table. The Joanna Briggs Institute (JBI) checklist for analytical cross-sectional studies

Utilised for: cross-sectional, ecological momentary assessment, mixed methods and longitudinal observational studies

| <i>Study</i>                | Were the criteria for inclusion in the sample clearly defined? | Were the study subjects and setting described in detail? | Was the exposure measured in a valid and reliable way? | Were objective, standard criteria used for measurement of the outcome(s)? | Were confounding factors identified? | Were strategies to deal with confounding factors stated? | Was appropriate statistical analysis used? | Total score (/7) | Grade    |
|-----------------------------|----------------------------------------------------------------|----------------------------------------------------------|--------------------------------------------------------|---------------------------------------------------------------------------|--------------------------------------|----------------------------------------------------------|--------------------------------------------|------------------|----------|
| 1. Baminiwatta et al (2021) | NO                                                             | NO                                                       | PARTLY                                                 | YES                                                                       | PARTLY                               | NO                                                       | UNCLEAR                                    | 1.5/7            | LOW      |
| 2. Ding and Xu (2021)       | PARTLY                                                         | YES                                                      | YES                                                    | YES                                                                       | NO                                   | NO                                                       | YES                                        | 4.5/7            | MODERATE |
| 3. Jarman et al (2021)      | YES                                                            | YES                                                      | YES                                                    | YES                                                                       | NO                                   | NO                                                       | YES                                        | 5/7              | MODERATE |
| 4. Jiotsa et al (2021)      | YES                                                            | PARTLY                                                   | PARTLY                                                 | YES                                                                       | YES                                  | NO                                                       | YES                                        | 5/7              | MODERATE |
| 5. Stein et al (2021)       | YES                                                            | NO                                                       | YES                                                    | YES                                                                       | YES                                  | YES                                                      | YES                                        | 6/7              | HIGH     |
| 6. Vall-Roque (2021)        | YES                                                            | NO                                                       | YES                                                    | YES                                                                       | NO                                   | NO                                                       | YES                                        | 4/7              | MODERATE |
| 7. Bennett et al (2020)     | YES                                                            | YES                                                      | YES                                                    | YES                                                                       | NO                                   | NO                                                       | YES                                        | 5/7              | MODERATE |
| 8. Cavazos-Rehg et          | YES                                                            | PARTLY                                                   | YES                                                    | YES                                                                       | NO                                   | NO                                                       | YES                                        | 4.5/7            | MODERATE |





|                      |     |     |        |     |    |    |     |       |          |
|----------------------|-----|-----|--------|-----|----|----|-----|-------|----------|
| 36. Tan et al (2016) | YES | YES | PARTLY | YES | NO | NO | YES | 4.5/7 | MODERATE |
|----------------------|-----|-----|--------|-----|----|----|-----|-------|----------|
