# Supplementary material for: The social media diet: A scoping review to investigate the association between social media, body image and eating disorders amongst young people
Source: PubMed Central journal article supplement (PMC10032524; doi:10.1371/journal.pgph.0001091), 2023-03-22
Supplement: pgph.0001091.s005.pdf [file pgph.0001091.s005.pdf]

## S5 Table. Adapted version of the Joanna Briggs Institute tool for quasi-experimental studies

Utilised for: Experimental and mixed methods experimental studies

| Study                             | Is it clear what is the 'exposure' and what is the 'outcome'? | Were participants included in comparisons similar? | Were both conditions the same except for the exposure? | Was there a control group? | Were there multiple measurements of the outcome both pre and post the exposure? | Was follow up complete and if not, were differences in follow up described adequately? | Were outcomes of participants included in comparisons measured in the same way? | Were outcomes measured in a reliable way? | Was appropriate statistical analysis used? | Total (/9) | Grade    |
|-----------------------------------|---------------------------------------------------------------|----------------------------------------------------|--------------------------------------------------------|----------------------------|---------------------------------------------------------------------------------|----------------------------------------------------------------------------------------|---------------------------------------------------------------------------------|-------------------------------------------|--------------------------------------------|------------|----------|
| 1. Disgnard and Jarry (2021)      | YES                                                           | YES                                                | YES                                                    | YES                        | UNCLEAR                                                                         | UNCLEAR                                                                                | YES                                                                             | PARTLY                                    | YES                                        | 6.5/9      | MODERATE |
| 2. Limniou et al (2021)           | YES                                                           | UNCLEAR                                            | UNCLEAR                                                | NO                         | NO                                                                              | NO                                                                                     | N/A                                                                             | PARTLY                                    | YES                                        | 2.5/9      | LOW      |
| 3. Prichard et al (2020)          | YES                                                           | UNCLEAR                                            | YES                                                    | YES                        | UNCLEAR                                                                         | UNCLEAR                                                                                | YES                                                                             | PARTLY                                    | YES                                        | 5.5/9      | MODERATE |
| 4. Tiggemann and Andenberg (2020) | YES                                                           | YES                                                | UNCLEAR                                                | YES                        | YES                                                                             | YES                                                                                    | YES                                                                             | PARTLY                                    | YES                                        | 7.5/9      | HIGH     |
| 5. Wick and Keel (2020)           | YES                                                           | UNCLEAR                                            | UNCLEAR                                                | YES                        | YES                                                                             | YES                                                                                    | YES                                                                             | PARTLY                                    | YES                                        | 6.5/9      | MODERATE |
| 6. Kleemans et al (2018)          | YES                                                           | UNCLEAR                                            | UNCLEAR                                                | YES                        | NO                                                                              | NO                                                                                     | YES                                                                             | PARTLY                                    | YES                                        | 5.5/9      | MODERATE |
| 7. Tiggemann et al                | YES                                                           | UNCLEAR                                            | UNCLEAR                                                | NO                         | YES                                                                             | NO                                                                                     | YES                                                                             | PARTLY                                    | YES                                        | 4.5/9      | MODERATE |

|                               |     |         |         |     |     |    |     |        |     |       |          |
|-------------------------------|-----|---------|---------|-----|-----|----|-----|--------|-----|-------|----------|
| (2018)                        |     |         |         |     |     |    |     |        |     |       |          |
| 8. Brown and Tiggemann (2016) | YES | YES     | UNCLEAR | YES | YES | NO | YES | PARTLY | YES | 6.5/9 | MODERATE |
| 9. Kim and Park (2016)        | YES | UNCLEAR | UNCLEAR | NO  | YES | NO | YES | PARTLY | YES | 4.5/9 | MODERATE |
