# Supplementary material for: The social media diet: A scoping review to investigate the association between social media, body image and eating disorders amongst young people
Source: PubMed Central journal article supplement (PMC10032524; doi:10.1371/journal.pgph.0001091), 2023-03-22
Supplement: pgph.0001091.s006.pdf [file pgph.0001091.s006.pdf]

## S6 Table. The Critical Appraisal Skills Checklist (CASP) utilised for qualitative studies

| Study                     | Was there a clear statement of the aims of the research? | Is a qualitative methodology appropriate? | Was the research design appropriate to address aims? | Was the recruitment strategy appropriate to aims? | Was the methodology adequately justified? | Has the relationship between researcher & participants been considered? | Have ethical issues been considered? | Was the data analysis sufficiently rigorous? | Is there a clear statement of findings? | Does the study add value? | Total (/10) | Grade    |
|---------------------------|----------------------------------------------------------|-------------------------------------------|------------------------------------------------------|---------------------------------------------------|-------------------------------------------|-------------------------------------------------------------------------|--------------------------------------|----------------------------------------------|-----------------------------------------|---------------------------|-------------|----------|
| 1. Mahon and Hevey (2021) | YES                                                      | YES                                       | YES                                                  | PARTLY                                            | YES                                       | YES                                                                     | YES                                  | PARTLY                                       | YES                                     | YES                       | 9/10        | HIGH     |
| 2. Wiklund et al (2019)   | YES                                                      | YES                                       | YES                                                  | YES                                               | YES                                       | NO                                                                      | YES                                  | PARTLY                                       | YES                                     | YES                       | 8.5/10      | HIGH     |
| 3. Easton et al (2018)    | YES                                                      | YES                                       | YES                                                  | PARTLY                                            | YES                                       | YES                                                                     | PARTLY                               | YES                                          | YES                                     | YES                       | 9.5/10      | HIGH     |
| 4. Burnette et al (2017)  | YES                                                      | YES                                       | YES                                                  | YES                                               | YES                                       | NO                                                                      | PARTLY                               | YES                                          | YES                                     | YES                       | 8.5/10      | HIGH     |
| 5. Baker et al (2019)     | PARTLY                                                   | YES                                       | YES                                                  | NO                                                | NO                                        | NO                                                                      | NO                                   | YES                                          | YES                                     | YES                       | 5.5/10      | MODERATE |
