# Supplementary material for: The social media diet: A scoping review to investigate the association between social media, body image and eating disorders amongst young people
Source: PubMed Central journal article supplement (PMC10032524; doi:10.1371/journal.pgph.0001091), 2023-03-22
Supplement: pgph.0001091.s007.pdf [file pgph.0001091.s007.pdf]

## S7. Data categorisation tables for the synthesis of results

The four sections below present detailed categorisation of Exposures, Outcomes, Mediators, and Moderations. Anomalies to the trend are indicated in red.

### EXPOSURES

**Table A: Social Media activities**

| Author (s)              | Study type | Findings                                                                                                                                      | Comments                                                   |
|-------------------------|------------|-----------------------------------------------------------------------------------------------------------------------------------------------|------------------------------------------------------------|
| <b>Time (n=7)</b>       |            |                                                                                                                                               |                                                            |
| Stein et al (2021)      | CS         | Time alone was not associated with body esteem and dietary restraint                                                                          | Suggestive of specific uses of IG as more important        |
| Scully et al (2020)     | CS         | Time alone on FB was not associated with BID – only via social comparison & internalization of ideal                                          | Not just FB use                                            |
| Wilkesh et al (2020)    | CS         | Time mediated the relationship for highly visual SM usage                                                                                     | Large sample size                                          |
| Yang et al (2020)       | CS         | Excessive time (+3 hours) on SM resulted in BID for adolescent girls but was mediated by comparison and thin/fit ideal                        |                                                            |
| Murray et al (2016)     | CS         | Excessive time on SM → diminished weight and appearance esteem → restrained eating for males and females                                      | Did not look at mediators                                  |
| Cohen et al (2017)      | CS         | Time alone not significantly related – only for appearance focused SM usage when mediated by thin ideal internalization and body surveillance |                                                            |
| Kaewpradub et al (2017) | CS         | Time on SM → bingeing, purging, use of laxatives and crash dieting                                                                            | Thailand<br>Did not look at mediators                      |
| <b>Frequency (n=2)</b>  |            |                                                                                                                                               |                                                            |
| Vall-Roque (2021)       | CS         | Higher frequency of SM usage during COVID-19 lockdown was significantly associated with BID and drive for thinness amongst p's aged 14-24     | Large sample size<br>Spain – not necessarily generalisable |

|                                                            |     |                                                                                                                                                                                                                                   |                                                                                         |
|------------------------------------------------------------|-----|-----------------------------------------------------------------------------------------------------------------------------------------------------------------------------------------------------------------------------------|-----------------------------------------------------------------------------------------|
| Bennett et al (2020) *                                     | EMA | Frequency of SM sites visited was predictive of BID, <b>but time spent was not</b>                                                                                                                                                | EMA study design- higher ecological validity but less comparable to other study designs |
| <b>Appearance focused social media platforms (n=3)</b>     |     |                                                                                                                                                                                                                                   |                                                                                         |
| Marengo et al (2018)                                       | CS  | Appearance focused SM use for >2hours/day (particularly IG and SC) was associated with BI concerns and internalizing symptoms                                                                                                     |                                                                                         |
| Cohen et al (2017)                                         | CS  | Appearance focused IG use → BI concerns in young women                                                                                                                                                                            |                                                                                         |
| Wilkcsch et al (2020)                                      | CS  | Time spent on image orientated platforms = DE cognitions and behaviours for adolescent girls and boys                                                                                                                             | Large sample size                                                                       |
| <b>Investment in appearance related activities (n =17)</b> |     |                                                                                                                                                                                                                                   |                                                                                         |
| <i>1. Selfie posting (n =3)</i>                            |     |                                                                                                                                                                                                                                   |                                                                                         |
| Baminiwatta et al (2021)                                   | CS  | Posting photos of the self → BID for the whole sample                                                                                                                                                                             | Sri Lankan study<br>Not necessarily generalisable – UN complex                          |
| Lonergan et al (2020)                                      | CS  | Avoidance of posting selfies, photo manipulation and investment in other's photos → greater likelihood of meeting criteria for clinical/subclinical ED                                                                            | Large sample size (4,209)<br>Adjusted for Sociodemographic variables                    |
| Baker et al (2019)                                         | Q   | Even if you're ugly in real life, if you're cute on Instagram, I feel like it doesn't matter<br>"When I'm feeling pretty down sometimes, I'll post a selfie, or a lot of selfies. When you get likes it feels good, accomplished" |                                                                                         |
| <i>2. Photo manipulation (n =7)</i>                        |     |                                                                                                                                                                                                                                   |                                                                                         |
| Baminiwatta et al (2021)                                   | CS  | Photo manipulation → BID amongst girls only                                                                                                                                                                                       | Comparable rates to Australian samples                                                  |
| Gioia (2020)                                               | CS  | Investment in likes and manipulation of photos → self-objectification which was moderated by body shame                                                                                                                           | Low quality                                                                             |
| Verrasto et al (2020)                                      | CS  | Editing photos → greater internalised stereotypes of beauty, BI anxiety, and fear of                                                                                                                                              |                                                                                         |

|                        |                           |                                                                                                                                                                                                                               |                                                                                                                         |
|------------------------|---------------------------|-------------------------------------------------------------------------------------------------------------------------------------------------------------------------------------------------------------------------------|-------------------------------------------------------------------------------------------------------------------------|
|                        |                           | negative evaluation                                                                                                                                                                                                           |                                                                                                                         |
| Wick and Keel (2020)   | MM- experimental & CS     | Assigned to posting edited photos → increased anxiety and restrict food intake                                                                                                                                                | Just 5 minutes- brief editing                                                                                           |
| Chang et al (2019)     | CS                        | Photo posting → positive body esteem                                                                                                                                                                                          | Receiving positive feedback as a confidence boost<br>Different tools used to assess BI                                  |
| Kleemans et al (2018)  | MM- experimental & survey | Exposure to manipulated (desirable) photos → BID with low awareness of edits                                                                                                                                                  | Small sample size<br>Low quality                                                                                        |
| Limniou et al (2021)   | MM- experimental & CS     | IG use and posting → higher state self esteem                                                                                                                                                                                 |                                                                                                                         |
| 3. Likes (n=7)         |                           |                                                                                                                                                                                                                               |                                                                                                                         |
| Limniou et al (2021)   | MM- experimental & CS     | Investment in likes associated with BID, low self-esteem & low mood                                                                                                                                                           | Homogenous sample<br>Small<br>Low quality                                                                               |
| Mahon and Hevey (2021) | Q                         | Emphasis placed on investing to look like others, seeking likes and feeling unworthy<br><b>“on IG you have to look perfect because you can see how many likes you get and people feel pressured. They want more likes”</b>    | Small sample                                                                                                            |
| Lonergan et al (2019)  | CS                        | SM photo manipulation and investment in feedback → BID                                                                                                                                                                        | Directionality not assumed                                                                                              |
| Tiggemann et al (2018) | Experimental              | Investment in likes → facial dissatisfaction but NOT BID                                                                                                                                                                      | Small homogenous sample<br>Different tools<br>Looking at other people’s photos rather than their own<br>Passive viewing |
| Howard et al (2017)    | CS                        | Investment in feedback → greater BID & DE pathology for entire sample                                                                                                                                                         |                                                                                                                         |
| Baker et al (2019)     | Q                         | Heavy investment in likes and comments, sending photos to friends, deleted photos without likes, edited<br><b>“It’s all about aesthetics”</b><br><b>“you can choose what to post, and control people’s perceptions of you</b> | Homogenous sample                                                                                                       |

|                     |    |                                                                                                                                                                                                                      |  |
|---------------------|----|----------------------------------------------------------------------------------------------------------------------------------------------------------------------------------------------------------------------|--|
|                     |    | <b>online”</b>                                                                                                                                                                                                       |  |
| Cavazos-Rehg (2020) | MM | <b>“I get more likes on my photos when I post a picture that accentuates a certain part of [my] face or body... I sometimes post about how unhappy I am with my appearance and people post nice things about me.</b> |  |

**Table B: Social Media Trends**

| Author (s)                     | Study type                  | Findings                                                                                                                                                                                                                                                                                                                                                                                                                            | Comments                                                                                                                                                      |
|--------------------------------|-----------------------------|-------------------------------------------------------------------------------------------------------------------------------------------------------------------------------------------------------------------------------------------------------------------------------------------------------------------------------------------------------------------------------------------------------------------------------------|---------------------------------------------------------------------------------------------------------------------------------------------------------------|
| <b>Fitspiration (n=8)</b>      |                             |                                                                                                                                                                                                                                                                                                                                                                                                                                     |                                                                                                                                                               |
| Limniou et al (2021)           | MM-<br>Experimental &<br>CS | Exposure to fitspiration = low self-esteem, low mood but no impact on body dissatisfaction                                                                                                                                                                                                                                                                                                                                          | Low ecological validity – only exposed to 5 photos and no captions (guilt promoting- part of fitspiration)<br>Small sample size – underpowered<br>Low quality |
| Krug et al (2020)              | EMA                         | Fitspiration exposure → pressure to attain ideal but no impact on mood or disordered eating                                                                                                                                                                                                                                                                                                                                         | Low ecological validity- only viewed 1 image 6x per day                                                                                                       |
| Prichard et al (2020)          | Experimental                | Fitspiration imagery → negative mood and BID and no difference in exercise behaviour                                                                                                                                                                                                                                                                                                                                                |                                                                                                                                                               |
| Raggatt et al (2018)           | MM                          | High risk group (17.7% risk of ED, 17.4% psychological distress, 10.3% addictive exercise)<br>Positive: motivation goal setting, community<br>Neg: anxiety, hampering ED recovery, pressure to eat clean<br><b>“it has slowed my recovery from an ED, it can cause anxiety and hopelessness to know that I will never look like ‘fitspiration people’</b><br><b>“it makes me upset that I don’t feel good enough to start with”</b> | All followed fitspiration content – certain type of individual                                                                                                |
| Tiggemann and Andenberg (2020) | Experimental                | Bare-chested images of hyper muscular males → BID                                                                                                                                                                                                                                                                                                                                                                                   | Short exposure<br>Male only<br>Not via comparison                                                                                                             |
| Easton et al (2018)            | Qualitative                 | Mixed findings: motivating, healthy recipes but comparisons, dangerous content, mental health, weight loss products, feelings of guilt, extreme meal plans, binging<br><b>“you lose sight of the goal of actually trying to become healthy rather than just</b>                                                                                                                                                                     | Small female sample. Does not distinguish between those who find it motivating and those who                                                                  |

|                                               |              |                                                                                                                                                                                                                                                                                                                                                                                                                     |                                                                                                           |
|-----------------------------------------------|--------------|---------------------------------------------------------------------------------------------------------------------------------------------------------------------------------------------------------------------------------------------------------------------------------------------------------------------------------------------------------------------------------------------------------------------|-----------------------------------------------------------------------------------------------------------|
|                                               |              | <p><b>looking good for pictures on social media”</b></p> <p><b>“people are putting up their best photos for a reason, and it’s not real life”</b></p>                                                                                                                                                                                                                                                               | find it damaging                                                                                          |
| Dignard and Jarry (2021)                      | Experimental | <p>Fitspiration and thinspiration → BID relative to control group travel images</p> <p>The wolf in little red riding hood</p> <p>Protective effects not implemented – less awareness</p>                                                                                                                                                                                                                            | <p>Suggestive of causality</p> <p>Equally damaging effects</p>                                            |
| Wiklund et al (2019) *                        | Qualitative  | A fit, good-looking body = social status, healthism, #neverrest, fed with ideals, appearance as an indicator of social status, extreme exercise diets promoted by those with influence, an unfinished body                                                                                                                                                                                                          |                                                                                                           |
| <b>Thinspiration and pro-ED content (n=3)</b> |              |                                                                                                                                                                                                                                                                                                                                                                                                                     |                                                                                                           |
| Fitsimmons-Craft (2020)                       | CS           | <p>96% followed thinspiration→ 86% met criteria for clinical/subclinical ED and 71% and 65% reported symptoms for depression and anxiety</p> <p>Surrounding selves with content, norm, emaciated people</p>                                                                                                                                                                                                         | <p>High risk sample</p> <p>Not representative</p> <p>Self-report questionnaire – bias or desirability</p> |
| Tan et al (2016)                              | CS           | <p>High DE scores→ sought out ED content especially on Youtube, weight loss and hiding an ED</p> <p>Anonymity, masking an ED, tips to go hungry – food content</p>                                                                                                                                                                                                                                                  | Clinical setting                                                                                          |
| Cavazos-Rehg (2020)                           | CS           | <p>Tips on being skinny, thinspo and bone thin girls</p> <p>fixating on body</p> <p><b>“it makes me want to work out to look like the models or people in the photos or videos” “motivate myself to get skinnier”</b></p> <p>“Thinspo accounts are dangerous. They post photos of bone-thin girls, and it definitely turns my focus to my body in negative ways” “triggers me into restricting and self-hatred”</p> |                                                                                                           |

# OUTCOMES

**Table C: Eating Disorder Pathology**

| Author (s)                                                                         | Study type      | Findings                                                                                                             | Comments                                                    |
|------------------------------------------------------------------------------------|-----------------|----------------------------------------------------------------------------------------------------------------------|-------------------------------------------------------------|
| <b>Clinical/ (n=5)</b>                                                             |                 |                                                                                                                      |                                                             |
| Lonergan et al (2020)                                                              | CS              | SM investment associated with criteria for meeting clinical or subclinical EDs and night eating syndrome             |                                                             |
| Aparicio-Martinez et al (2019)                                                     | CS              | SM use significantly associated with DE – 28.5% DE attitudes, 38.7% BN symptoms and 20.7% dieting                    | EAT-26 questionnaire- gold standard                         |
| Puccio et al (2016)                                                                | CS longitudinal | BID → BN, depression, and restrained eating                                                                          |                                                             |
| Fitzsimmons (2020)                                                                 | CS              | 96% followed thinspiration content, 84% met criteria for clinical/subclinical ED                                     | Extremely high – high risk population                       |
| Saunders and Eaton (2018)                                                          | CS              | Significant association between SM use and BED and cognitive restraint                                               | Large sample size                                           |
| <b>Subclinical/OSFED (n=2)</b>                                                     |                 |                                                                                                                      |                                                             |
| Wiklund et al (2019)                                                               | Qualitative     | Fitness fixation, extreme exercise, and obsessions with healthy food – orthorexia symptomatology – need to eat clean | Small sample<br>Not measuring ED explicitly                 |
| Turner and Lefevre (2017)                                                          | CS              | IG use significantly associated with ON (49% prevalence vs <1% general population) – demonise certain foods          | Biased recruitment – fitness pages<br>Legitimate scale used |
| <b>DE pathology (n=12)</b>                                                         |                 |                                                                                                                      |                                                             |
| <i>Food control, dieting, laxative use, dietary restraint, compulsive exercise</i> |                 |                                                                                                                      |                                                             |
| Ding and Xu (2021)                                                                 | CS              | Social comparisons on SM → emotional eating amongst girls and boys                                                   |                                                             |
| Stein et al (2021)                                                                 | CS              | SNS (IG) → increased risk for DE amongst males and females                                                           |                                                             |
| Choukas-Bradley (2020)                                                             | CS              | Comparisons on SM → DE for girls only                                                                                |                                                             |

|                                         |                      |                                                                                                                                                                                                                                                                                                                                                                                                        |                         |
|-----------------------------------------|----------------------|--------------------------------------------------------------------------------------------------------------------------------------------------------------------------------------------------------------------------------------------------------------------------------------------------------------------------------------------------------------------------------------------------------|-------------------------|
| Krug et al (2020)                       | EMA                  | Exposure to fitspiration → no impact on mood or DE pathology                                                                                                                                                                                                                                                                                                                                           | Low ecological validity |
| Wilkcsch et al (2020)                   | CS                   | SM → DE behaviours including meal skipping and extreme exercise – reported by 51.7% girls and 45% boys                                                                                                                                                                                                                                                                                                 | Self-report             |
| Rodgers et al (2020)                    | CS                   | SM use associated with BID, dietary restraint and muscle building behaviours for girls and boys                                                                                                                                                                                                                                                                                                        |                         |
| Wick and Keel (2020)                    | MM                   | Photo manipulation → ED symptomatology & anxiety                                                                                                                                                                                                                                                                                                                                                       | EAT-26 scale used       |
| Raggatt et al (2018)                    | MM                   | Association between fitspiration on SM & ED risk (17.7% high risk), psychological distress (17.4%) & addictive exercise (10.3%)                                                                                                                                                                                                                                                                        | Small sample size       |
| Kaewpradub et al (2017)                 | CS                   | Time on SM → bingeing, purging, use of laxatives and crash dieting                                                                                                                                                                                                                                                                                                                                     | Thailand                |
| Howard et al (2017)                     | CS                   | Investment in peer feedback → DE for entire sample                                                                                                                                                                                                                                                                                                                                                     |                         |
| Santarossa (2017)                       | CS                   | SM activities (investment) → higher ED symptoms                                                                                                                                                                                                                                                                                                                                                        |                         |
| Murray et al (2016)                     | CS                   | Excessive time → emotional eating (females) and restrained eating (both genders)                                                                                                                                                                                                                                                                                                                       |                         |
| <b>ED maintenance or recovery (n=2)</b> |                      |                                                                                                                                                                                                                                                                                                                                                                                                        |                         |
| Tan et al (2016)                        |                      | EDs sought out content on YT: weight loss, tips on hiding an ED<br>50% reported that it helped to maintain their ED<br>18.2% AN, 23.6% bingeing, BN, 9.1%                                                                                                                                                                                                                                              | Clinical setting        |
| Cavazos-Rehg et al (2020) **            | MM- CS & qualitative | Some engaged with SM for ED recovery & seeking treatment (2.9%), community – 97% - triggered ED<br>BUT more often was to restrict diet, and lose weight, trigger ED behaviour<br><b>“They hinder recovery and reinforce the thin ideal”</b><br><b>“When I get really hungry, I do into these sites to get a little extra motivation to not eat just for a bit longer”</b><br>Normalising ED behaviours | Self-report             |



**Table D: Body Image concerns**

| Author (s)                                                                                                                                                                                                                                                                                                                                                | Study type                    | Findings                                            | Comments                    |
|-----------------------------------------------------------------------------------------------------------------------------------------------------------------------------------------------------------------------------------------------------------------------------------------------------------------------------------------------------------|-------------------------------|-----------------------------------------------------|-----------------------------|
| <b>BID (n=36) including feelings of body shame, low self-esteem and body related anxiety</b>                                                                                                                                                                                                                                                              |                               |                                                     |                             |
| 33 demonstrated a significant relationship between various forms of SM usage and BID – relatively homogenous finding<br>Exceptions –<br>Krug (2020) - low ecological validity<br>Chang et al (2019)- posting and positive outcomes (confidence boost)<br>Tiggemann et al (2018)- number of likes – looking at other people’s photos rather than their own |                               |                                                     |                             |
| <b>BI as preceding DE pathology (n= 5)</b>                                                                                                                                                                                                                                                                                                                |                               |                                                     |                             |
| Yao et al (2020)                                                                                                                                                                                                                                                                                                                                          | CS                            | BI → SNS appearance comparisons → restrained eating | Hypothesised                |
| Murray et al (2016)                                                                                                                                                                                                                                                                                                                                       | CS                            | SNS → low body esteem → ED pathology                | Hypothesised                |
| Marengo (2018)                                                                                                                                                                                                                                                                                                                                            | CS                            | SNS → BIDI → ED pathology & internalising symptoms  | Hypothesised                |
| Puccio et al (2016)                                                                                                                                                                                                                                                                                                                                       | Observational<br>longitudinal | FB use → BID → BN symptomatology prospectively      | One-month follow up – short |
| Saunders and Eaton (2018)                                                                                                                                                                                                                                                                                                                                 | CS                            | SNS→ BID → ED pathology                             | Hypothesised                |

**Table E: Mental health comorbidities**

| Author (s)                                   | Study type   | Findings                                                                                                                       | Comments                           |
|----------------------------------------------|--------------|--------------------------------------------------------------------------------------------------------------------------------|------------------------------------|
| <b>Mood (n= 4)</b>                           |              |                                                                                                                                |                                    |
| Krug et al (2020)                            | EMA          | Fitspiration → no effect on mood                                                                                               | Low ecological validity            |
| Prichard et al (2020)                        | Experimental | Fitspiration → higher negative mood relative to control travel images                                                          |                                    |
| Easton et al (2018)                          | Qualitative  | Negative effects on emotional wellbeing                                                                                        | Small sample size                  |
| Brown and Tiggemann (2016)                   | Experimental | Attractive celebrity and peer images → negative mood                                                                           |                                    |
| <b>Anxiety and Depressive symptoms (n=5)</b> |              |                                                                                                                                |                                    |
| Raggatt et al (2018)                         | CS           | 17.7% reported high levels of psychological distress                                                                           |                                    |
| Choukas-Bradley et al (2020)                 | CS           | Association between comparisons on SM & higher depressive symptoms for girls and boys                                          |                                    |
| Fitzsimmons-Craft (2020)                     | CS           | 71% sample reported symptoms consistent with depression and 65% with anxiety (84% met criteria for clinical or subclinical ED) | Self-report<br>High<br>100% female |
| Wick and Keel (2020)                         | MM           | Posting edited photos significantly associated with anxiety but not depressive symptoms                                        |                                    |
| Marengo et al (2018)                         | CS           | Significant association between SM usage and internalizing symptoms                                                            |                                    |

# MEDIATORS

**Table F: Mediators**

| Author (s)                                   | Study type                  | Findings                                                                                                                                                                                                                                 | Comments                                           |
|----------------------------------------------|-----------------------------|------------------------------------------------------------------------------------------------------------------------------------------------------------------------------------------------------------------------------------------|----------------------------------------------------|
| <b>Thin/fit ideal internalisation (n=12)</b> |                             |                                                                                                                                                                                                                                          |                                                    |
| Jarman et al (2021)                          | CS                          | SM use → BID and low wellbeing via mediating pathways of thin/fit ideal for girls and boys                                                                                                                                               | Large sample size                                  |
| Limniou et al (2021)                         | MM-<br>Experimental<br>& CS | Fitspiration images → fit ideal internalisation reduced after viewing fitspiration images                                                                                                                                                | Low ecological validity- 5 images without captions |
| Rodgers et al (2020)                         | CS                          | SM usage → BID via internalisation of the ideal and comparison                                                                                                                                                                           | Large sample size                                  |
| Scully et al (2020)                          | CS                          | Appearance SM usage → BID via social comparison and internalization of the ideal                                                                                                                                                         |                                                    |
| Tiggemann and Andenbeg (2020)                | Experimental                | Exposure to bare chested fitspiration photos → BID but not via fit/muscular ideal internalisation                                                                                                                                        | Male only<br>Different mechanisms                  |
| Verrastro et al (2020)                       | CS                          | Edit photos → greater internalisation of ideal → BID                                                                                                                                                                                     | Large sample                                       |
| Aparicio-Martinez (2019)                     | CS                          | Problematic SM usage → BID and DE, strong desire for ideal body                                                                                                                                                                          |                                                    |
| Wiklund et al (2019)                         | Qualitative                 | Failing to meet the ideal → alienation, imperfection<br>Pressure to adhere to a predefined ideal<br><b>“you are fed with their ideals, it gets to you, without being aware”</b><br>Girls – remaining slim but toned and not too muscular | Small sample                                       |
| Cohen et al (2017)                           | CS                          | Appearance SM use → BI concerns via thin ideal internalisation and body surveillance                                                                                                                                                     |                                                    |
| Baker et al (2019)                           | Qualitative                 | Pressure to adhere to ideal – describe many different shapes- flawless makeup, stick thin, hourglass figure<br><b>“we both followed the girl I mentioned that’s just so pretty. We will</b>                                              | Small sample                                       |

|                                      |                            |                                                                                                                                                                                                                                                         |                                                                 |
|--------------------------------------|----------------------------|---------------------------------------------------------------------------------------------------------------------------------------------------------------------------------------------------------------------------------------------------------|-----------------------------------------------------------------|
|                                      |                            | <b>screenshot her pictures and try to mimic them”</b>                                                                                                                                                                                                   |                                                                 |
| Yang et al (2020)                    | CS                         | Excessive SM use → BID via internalisation of thin/fit ideal and upward appearance comparisons                                                                                                                                                          |                                                                 |
| Mahon and Hevey (2021)               | Qualitative                | Picking flaws and self-blame for not adhering to the ideal for males and females                                                                                                                                                                        | Small sample                                                    |
| <b>Appearance comparisons (n=21)</b> |                            |                                                                                                                                                                                                                                                         |                                                                 |
| Dignard and Jarry (2021)             | Experimental               | Viewing fitspiration & thinspiration → BID via appearance comparisons                                                                                                                                                                                   |                                                                 |
| Ding and Xu (2021)                   | CS                         | SM → emotional eating mediated by upward comparisons and anxiety for both genders                                                                                                                                                                       |                                                                 |
| Jarman et al (2021)                  | CS                         | Appearance SM usage → BID and low wellbeing via appearance comparisons and ideal internalisation                                                                                                                                                        |                                                                 |
| Jiotsa (2021)                        | CS                         | Association between frequency of comparisons and BID & drive for thinness                                                                                                                                                                               | Large sample size<br>Majority female                            |
| Mahon and Hevey (2021)               | Qualitative                | Despite awareness, engaged in comparisons with others – SM influencers, celebrities<br><b>“Why can’t I look like that, why can’t I be that person?”</b><br><b>‘We always compare ourselves to the people we see on SM, so we don’t see their flaws’</b> | Small sample                                                    |
| Rodgers et al (2020)                 | CS                         | SM ideal internalisation and higher upward appearance comparison → BID                                                                                                                                                                                  |                                                                 |
| Rosseau et al (2017)                 | Observational longitudinal | <b>Comparisons on FB not predictive of increases in BID 6-months later</b>                                                                                                                                                                              | Other mechanisms at play<br>FB outdated amongst younger samples |
| Scully et al (2020)                  | CS                         | Significant relationship between appearance-based SM and BID via social comparison and internalisation of the ideal                                                                                                                                     |                                                                 |
| Tiggemann and Andenberg (2020)       | Experimental               | <b>Social comparison did not mediate the relationship between fitspiration images and BID</b>                                                                                                                                                           | Male sample<br>Singapore                                        |
| Yang et al (2020)                    | CS                         | Excessive SM use → BID via upward appearance comparisons                                                                                                                                                                                                |                                                                 |

|                                   |                               |                                                                                                                                                                                                                             |                                  |
|-----------------------------------|-------------------------------|-----------------------------------------------------------------------------------------------------------------------------------------------------------------------------------------------------------------------------|----------------------------------|
| Yao et al (2020)                  | CS                            | SM usage → comparisons → shame → restrained eating                                                                                                                                                                          |                                  |
| Chang et al (2019)                | CS                            | Photo browsing on IG → negative BE via appearance comparisons                                                                                                                                                               |                                  |
| Saunders and Eaton (2018)         | CS                            | Positive correlation between upward comparison and DE outcomes<br>Stronger for IG and SC                                                                                                                                    | Hispanic sample                  |
| Brown and Tiggemann (2016)        | Experimental                  | Exposure to celebrity & peer images → BID via upward comparison<br>Didn't matter if it were celebrities or peers                                                                                                            | Only partly agrees with SCT      |
| Puccio et al (2016)               | Observational<br>longitudinal | Social comparisons mediated relationship between FB use & BN symptomatology                                                                                                                                                 |                                  |
| Tan et al (2016)                  | CS                            | 70.9% of sample reported comparing themselves to others on SM                                                                                                                                                               | Clinical sample – high risk      |
| Baker et al (2019)                | Qualitative                   | Comparison to others to degree that p's would imitate photos and recreate                                                                                                                                                   | University students              |
| Burnette et al (2017)             | Qualitative                   | Despite SM literacy, <b>some girls</b> still compared with others<br>Could appreciate beauty without jealousy                                                                                                               | 6 focus groups                   |
| Cavazos-Rehg (2020)               | MM                            | <b>“I obsessively compare my body and lifestyle to others”</b>                                                                                                                                                              |                                  |
| Easton et al (2018)               | Qualitative                   | <b>“When I see fitness accounts where all the girls are like svelte and toned, I'm like oh, it's hard to love me when I look like this”</b>                                                                                 |                                  |
| Baker et al (2019)                | Qualitative                   | <b>“I thought it was only celebrities that looked like that, but I think it's everybody, so I'm the ugly one basically”</b>                                                                                                 |                                  |
| <b>Self-objectification (n=6)</b> |                               |                                                                                                                                                                                                                             |                                  |
| Saunders and Eaton (2018)         | CS                            | Body surveillance mediated the relationship between SM use, BID and DE outcomes                                                                                                                                             |                                  |
| Cohen et al (2017)                | CS                            | Body surveillance mediated the relationship between appearance SM use and BI concerns for women                                                                                                                             |                                  |
| Baker et al (2019)                | Qualitative                   | Internalising 3 <sup>rd</sup> person perspective of the self, worrying about how one looks to others                                                                                                                        |                                  |
| Mahon and Hevey (2021)            | Qualitative                   | Picking out flaws in photos, hating photos, self-criticism<br><b>The more you look at the photo you're like 'God I hate it' you see things that other people wouldn't see and you're like 'I hate everything about it'.</b> |                                  |
| Choukas-Bradley et al (2020)      | CS                            | Higher scores on ARSMC → DE amongst 96% girls and 91% boys                                                                                                                                                                  | Scale developed to assess degree |

|                                               |    |                                                                                                                   |                                                                                                  |
|-----------------------------------------------|----|-------------------------------------------------------------------------------------------------------------------|--------------------------------------------------------------------------------------------------|
|                                               |    | "Imaginary audience"                                                                                              | to which people care about online appearance                                                     |
| Cavazos-Rehg (2020)                           | MM | <b>"I get more likes on my photos when I post a picture that accentuates a certain part of [my] face or body"</b> |                                                                                                  |
| <b>Other (n= 2)</b>                           |    |                                                                                                                   |                                                                                                  |
| <i>Anxiety (n=1)</i>                          |    |                                                                                                                   |                                                                                                  |
| Ding and Xu (2021)                            | CS | Social comparisons → appearance anxiety → emotional eating                                                        | China<br>Plausible that appearance anxiety precedes both social comparisons and emotional eating |
| <i>Self-schema and self-discrepancy (n=1)</i> |    |                                                                                                                   |                                                                                                  |
| Ahadzadeh et al (2017)                        | CS | IG photo exposure associated with BID but mediated by self-schema → self-discrepancy                              | Novel finding                                                                                    |

## MODERATORS

**Table G: Biological**

| Author (s)                     | Study type            | Findings                                                                                                                                                                                    | Comments                                                        |
|--------------------------------|-----------------------|---------------------------------------------------------------------------------------------------------------------------------------------------------------------------------------------|-----------------------------------------------------------------|
| <b>Gender (n=18)</b>           |                       |                                                                                                                                                                                             |                                                                 |
| <i>Difference (n= 14)</i>      |                       |                                                                                                                                                                                             |                                                                 |
| Ding and Xu (2021)             | CS                    | Females more sensitive to appearance comparisons and showed more emotional eating tendencies                                                                                                | Equal ratio of girls to boys<br>Micro-blogs – different SM form |
| Limniou et al (2021)           | MM- Experimental & CS | Exposure to fitspiration images- males internalised fit ideal more but females showed lower mood post exposure                                                                              |                                                                 |
| Mahon and Hevey (2021) *       | Qualitative           | Girls placed greater emphasis on comparisons, awareness of editing and had lower SE vs boys who saw muscular ideal as motivating<br><b>B – “I’m grand just the way I am”</b>                | Stigma for boys<br>Majority female sample                       |
| Stein et al (2021)             | CS                    | Females held unfavourable views of own bodies and others but IG → DE equally for males and females                                                                                          | Online sample                                                   |
| Choukas-Bradley (2020)         | CS                    | Higher appearance comparisons → DE in boys only                                                                                                                                             | Alternative measure                                             |
| Gioia (2020) *                 | CS                    | Young women displayed higher levels of body shame, invested more in self photos                                                                                                             |                                                                 |
| Rodgers et al (2020)           | CS                    | Gender moderated the relationship between SM & muscular ideal internalisation for boys only *                                                                                               |                                                                 |
| Tiggemann and Andenberg (2020) | Experimental          | Fitspiration → BID relative to control but not via social comparison and muscular ideal internalisation                                                                                     | Novel<br>Other mechanisms for men?                              |
| Verrastro et al (2020)         | CS                    | Females showed higher levels of BI anxiety and internalised the ideal of beauty more but both genders feared negative evaluation from peers                                                 |                                                                 |
| Easton et al (2018)            | Qualitative           | Damaging fitspiration effects emerged as stronger for girls<br><b>I reckon it probably negatively affects boys, but they don’t express it. If a boy did he’d probably be called a wimp”</b> |                                                                 |

|                                |             |                                                                                                                              |                                                                                                     |
|--------------------------------|-------------|------------------------------------------------------------------------------------------------------------------------------|-----------------------------------------------------------------------------------------------------|
| Kaewpradub et al (2017)        | CS          | Female p's demonstrated greater BID and DE pathology                                                                         | Thailand                                                                                            |
| Murray et al (2016)            | CS          | SM → emotional eating for females only                                                                                       | More invested emotionally<br>Self-report                                                            |
| Wilksch et al (2020)           | CS          | Girls posted more photos of food and displayed higher DE cognitions                                                          | Low quality                                                                                         |
| Cavazos-Rehg (2020)            | CS          | Subclinical ED group contained high proportion of transgender participants – risk - warrants further research                |                                                                                                     |
| <i>No difference (n=4)</i>     |             |                                                                                                                              |                                                                                                     |
| Baminiwatta et al (2021)       | CS          | Selfies and BID for entire sample                                                                                            | Low quality                                                                                         |
| Jarman et al (2021)            | CS          | Gender not a significant moderator for appearance SM use & BID but boys <b>more likely to internalise the muscular ideal</b> |                                                                                                     |
| Santarossa and Woodruff (2017) | CS          | No difference between genders for SM investment, BI concerns and ED pathology                                                |                                                                                                     |
| De Vries et al (2019)          | CS          | SM → BID for male and female adolescents                                                                                     | Different scales, younger age group= more susceptible?                                              |
| <b>BMI (n=5)</b>               |             |                                                                                                                              |                                                                                                     |
| Baminiwatta et al (2021)       | CS          | BMI directly associated with BID                                                                                             | Sri Lanka<br>Low quality                                                                            |
| Rodgers et al (2020)           | CS          | BMI directly associated with BID but also heightened comparison and SM ideal internalisation                                 |                                                                                                     |
| Yao et al (2020)               | CS          | <b>High BMI → more BI comparisons but low BMI → more shame and restrained eating</b>                                         | Inconsistent- lower BMI so closer to the ideal- behaviours as more in reach<br>Very low average BMI |
| Jiotsa (2021)                  | CS          | <b>BMI was not a moderator between SM use and ED pathology</b>                                                               | 193 ED patients- skewed findings – lower BMI                                                        |
| Easton (2018)                  | Qualitative | <b>“If you’re a bigger size it can make you feel horrendous, it can make you feel</b>                                        |                                                                                                     |



|                                                 |              |                                                                                                                      |                                                           |
|-------------------------------------------------|--------------|----------------------------------------------------------------------------------------------------------------------|-----------------------------------------------------------|
|                                                 |              | <b>completely alien, and that you shouldn't look like that"</b>                                                      |                                                           |
| <b>Age (n=1)</b>                                |              |                                                                                                                      |                                                           |
| <i>Inconclusive</i>                             |              |                                                                                                                      |                                                           |
| Vall-Roque (2021)                               | CS           | SNS frequency (appearance focused) → stronger for younger p's 14-24                                                  | Large sample                                              |
| <b>Race/Ethnicity (n=3)</b>                     |              |                                                                                                                      |                                                           |
| <i>Inconclusive</i>                             |              |                                                                                                                      |                                                           |
| Howard et al (2017)                             | CS           | Race was not a significant moderator, but Black women reported marginally less DE and higher state body satisfaction | Large sample size                                         |
| Wick and Keel (2020)                            | MM           | Editing & posting photos – stronger effect for White & Asian participants                                            | 77% White                                                 |
| Dignard and Jarry (2021)                        | Experimental | Non-white participants – fitspiration & BID was not mediated by appearance comparisons                               | SM images not reflective of themselves<br>Canadian sample |
| <b>Hormones (n=1)</b>                           |              |                                                                                                                      |                                                           |
| <i>Inconclusive – warrants further research</i> |              |                                                                                                                      |                                                           |
| Aparicio-Martinez (2019)                        | CS           | High levels of prenatal testosterone → decreased association between SM use, BID and DE behaviours                   |                                                           |

**Table H: Cognitive**

| Author (s)                            | Study type                 | Findings                                                                                                                                                  | Comments                                                      |
|---------------------------------------|----------------------------|-----------------------------------------------------------------------------------------------------------------------------------------------------------|---------------------------------------------------------------|
| <b>Pre-existing BI concerns (n=6)</b> |                            |                                                                                                                                                           |                                                               |
| <i>BID/body shame/low self-esteem</i> |                            |                                                                                                                                                           |                                                               |
| Gioia (2020)                          | CS                         | Body shame predicted image control and problematic SM use in males and females                                                                            | CS so cannot assume directionality<br>Low quality             |
| Rousseau (2017)                       | Observational longitudinal | State BID predicted comparisons on FB 6-months later                                                                                                      | Indicating that dissatisfied individuals are more susceptible |
| Ahadzadeh et al (2017)                | CS                         | Low self-esteem → strengthened relationship between SM, BI & ED pathology                                                                                 |                                                               |
| Kim and Park (2016)                   | Experimental               | Low self-esteem → strengthened relationship between SM comparisons and BID                                                                                |                                                               |
| <i>Body appreciation</i>              |                            |                                                                                                                                                           |                                                               |
| Yao et al (2020)                      | CS                         | Body appreciation buffered the relationship between SM usage, BS and restrained eating                                                                    |                                                               |
| Lonergan et al (2019)                 | CS                         | Self-compassion did not moderate the relationship between SM photo manipulation and BID                                                                   | Discrepancy in tools used                                     |
| <b>Underlying risk of ED (n=5)</b>    |                            |                                                                                                                                                           |                                                               |
| Jiotsa (2021)                         | CS                         | High SCOFF scores = higher BID, drive for thinness and comparisons                                                                                        | Large sample size<br>1331                                     |
| Cavazos-Rehg (2020)                   | MM- CS and open questions  | Clinical/ED subgroup- stronger relationship between wanting to be thin and restricting food intake                                                        |                                                               |
| Fitsimmons-Craft (2020)               | CS                         | 96% followed thinspiration content and 86% met criteria for an ED – strong relationship between ED content and diagnoses                                  | CS- cannot assume directionality                              |
| Verrastro (2020)                      | CS                         | Adolescents with greater internalised standards of beauty report higher BI anxiety, pressure to adhere to ideal & fear of negative evaluation from others | CS                                                            |

|                                        |              |                                                                                                                             |  |
|----------------------------------------|--------------|-----------------------------------------------------------------------------------------------------------------------------|--|
| Tan et al (2016)                       | CS           | Those with higher ED scores sought out certain damaging ED content: weight loss info, tips on hiding an ED, finding support |  |
| <b>Other: personality traits (n=2)</b> |              |                                                                                                                             |  |
| Puccio (2016)                          | CS           | Stronger relationship between SM & BN for those with personality trait sociotrophy                                          |  |
| Kim and Park (2016)                    | Experimental | Exposure to attractive peers → BID with larger effect size of those with high appearance comparison tendencies              |  |

**Table I: Socioenvironmental**

| Author (s)                          | Study type                | Findings                                                                                                                                                                                                                                                 | Comments                                                               |
|-------------------------------------|---------------------------|----------------------------------------------------------------------------------------------------------------------------------------------------------------------------------------------------------------------------------------------------------|------------------------------------------------------------------------|
| <b>SM literacy (n=4)</b>            |                           |                                                                                                                                                                                                                                                          |                                                                        |
| Burnette (2017) **                  | Qualitative               | SM education at school buffered effect. Still compared but did not lead to significant BI concerns or ED pathology<br>Learnt about artificiality, self-acceptance & body diversity<br><b>“I don’t need people to tell me I’m pretty on social media”</b> | Anomaly<br>Small sample size                                           |
| Mahon and Hevey (2021)              | Qualitative               | Contrasts with Burnette^ less SM literacy and greater impact                                                                                                                                                                                             | Anomaly to general trend                                               |
| Easton et al (2018) **              | Qualitative               | Participants were critical of SM yet still struggled to switch off from posts & avoid negative feelings about the body and eating concerns                                                                                                               | Older sample – maybe had not had the same nurturing school environment |
| Kleemans (2018)                     | MM- Experimental & survey | Exposure to edited photos → BID<br>Low awareness of editing practices, rated as more attractive                                                                                                                                                          | Low SM generally                                                       |
| <b>Parental relationships (n=1)</b> |                           |                                                                                                                                                                                                                                                          |                                                                        |
| DeVries et al (2019)                | CS                        | SM → BID but weaker for adolescents with a positive mother-adolescent relationship                                                                                                                                                                       | Needs further research                                                 |
| <b>Life events (n=2)</b>            |                           |                                                                                                                                                                                                                                                          |                                                                        |
| Easton (2018)                       | Qualitative               | Fitspiration affected emotional state more when mood was low combined with sensitivity following stressful life events                                                                                                                                   | Insight                                                                |
| Cavazos-Rehg (2020)                 | MM                        | <b>“They don’t always have a substantial effect on me but at times of weakness they can push me into relapse”</b>                                                                                                                                        |                                                                        |
